# Supplementary material for: Systematic characterization of Puerariae Flos metabolites in vivo and assessment of its protective mechanisms against alcoholic liver injury in a rat model
Source: Front Pharmacol. 2022 Aug 30;13:915535. doi: 10.3389/fphar.2022.915535 (PMC9468746; doi:10.3389/fphar.2022.915535)
Supplement: Supplementary file 1 [file Table2.XLSX]

## Sheet: Sheet1
Compound	Target
M11	GOT2
M11	TRIM5
M11	CPA4
M11	CHKB
M11	CUEDC2
M11	POU4F1
M11	TUFM
M11	HBA1
M11	DHRS9
M15	TRIM5
M15	CPA4
M15	CHKB
M15	CUEDC2
M15	POU4F1
M15	TUFM
M15	DHRS9
M15	TOP2A
M16	GOT2
M16	CHKB
M16	POU4F1
M16	TUFM
M16	GRASP
M16	QARS
M16	KPNB1
M16	RAD51
M16	TOP2A
M16	VPS4A
M16	ALDH2
M16	IL2
M16	TNF
M17	ALDH2
M17	IL2
M17	TNF
M17	ADORA1
M17	TYMS
M17	GOT2
M17	CHKB
M17	CUEDC2
M17	POU4F1
M17	QARS
M17	DHRS9
M17	TOP2A
M19	FASN
M19	GOT2
M19	TRIM5
M19	CPA4
M19	CHKB
M19	POU4F1
M19	DHRS9
M19	TYMS
M19	ITGAV
M20	POLD3
M20	TUFM
M20	QARS
M20	IGHG1
M20	FES
M20	RAB22A
M20	SOD1
M21	ACOX1
M21	CHKB
M21	TUFM
M21	DHRS9
M21	VAV1
M21	SOD1
M21	TOP2A
M21	TYR
M26	CPA4
M26	C1QBP
M26	NUP214
M26	GSK3B
M26	UNC45A
M26	VAV1
M3	ADORA1
M3	TYMS
M3	ADORA2A
M3	FOLR1
M3	GART
M3	GOT2
M3	TRIM5
M3	CPA4
M3	CHKB
M3	CUEDC2
M3	POU4F1
M3	TUFM
M3	DHRS9
M36	CPA4
M36	POU4F1
M36	TPI1
M36	SPAG9
M36	VAV1
M36	SOD1
M36	TOX
M36	TYR
M55	GOT2
M55	CHKB
M55	POLD3
M55	POU4F1
M55	TUFM
M55	IGLC1
M55	NEU1
M55	SOD1
M55	TOP2A
M55	SRC
P15	CPA4
P15	POU4F1
P15	HBA1
P15	LDHB
P15	SOD1
P15	TOP2A
P15	UPRT
P15	EGFR
P15	ADORA1
P15	ADORA2A
P15	HSD17B2
P15	CA7
P15	CA12
P15	CA4
P15	HSD17B1
P15	ESR2
P15	ESR1
P15	PTPRS
P15	CYP19A1
P15	ALOX12
P15	IL2
P15	CBR1
P15	ESRRA
P15	ABCG2
P15	ABCB1
P15	XDH
P15	MAOA
P15	PFKFB3
P15	TYR
P15	TBXAS1
P15	MGAM
P15	HTR2A
P15	HTR2C
P15	ESRRB
P15	PTGS1
P15	SLC6A2
P15	ALDH2
P15	NOX4
P15	PIM1
P15	PPARA
P15	ALOX15
P15	ACHE
P15	AKR1B1
P15	CA2
P15	TLR9
P15	MIF
P15	PON1
P15	CA1
P15	BACE1
P15	MCL1
P15	SNCA
P15	IGFBP6
P15	IGFBP4
P15	IGFBP5
P15	IGFBP2
P15	IGFBP3
P15	IGFBP1
P15	PRSS1
P15	F10
P15	PLAU
P15	STS
P15	BAD
P15	HSP90B1
P6	POU4F1
P6	GPI
P6	KMT2A
P6	TPI1
P6	SPAG9
P6	SOD1
P6	TOX
P6	TAGLN2
P6	IL2
P6	TNF
P6	ALDH2
P6	ADORA1
P6	AKR1B1
P6	CA13
P6	XDH
P6	CA1
P6	CA12
P6	CA9
P6	MMP2
P6	MMP12
P6	HSP90AA1
P6	CA2
P6	CA7
