# Supplementary material for: Systematic characterization of Puerariae Flos metabolites in vivo and assessment of its protective mechanisms against alcoholic liver injury in a rat model
Source: Front Pharmacol. 2022 Aug 30;13:915535. doi: 10.3389/fphar.2022.915535 (PMC9468746; doi:10.3389/fphar.2022.915535)
Supplement: Supplementary file 7 [file Table6.XLSX]

## Sheet: Compound-Target
Compound	Target
M11	GOT2
M11	TRIM5
M11	CPA4
M11	CHKB
M11	CUEDC2
M11	POU4F1
M11	TUFM
M11	HBA1
M11	DHRS9
M15	TRIM5
M15	CPA4
M15	CHKB
M15	CUEDC2
M15	POU4F1
M15	TUFM
M15	DHRS9
M15	TOP2A
M16	GOT2
M16	CHKB
M16	POU4F1
M16	TUFM
M16	GRASP
M16	QARS
M16	KPNB1
M16	RAD51
M16	TOP2A
M16	VPS4A
M16	ALDH2
M16	IL2
M16	TNF
M17	ALDH2
M17	IL2
M17	TNF
M17	ADORA1
M17	TYMS
M17	GOT2
M17	CHKB
M17	CUEDC2
M17	POU4F1
M17	QARS
M17	DHRS9
M17	TOP2A
M19	FASN
M19	GOT2
M19	TRIM5
M19	CPA4
M19	CHKB
M19	POU4F1
M19	DHRS9
M19	TYMS
M19	ITGAV
M20	POLD3
M20	TUFM
M20	QARS
M20	IGHG1
M20	FES
M20	RAB22A
M20	SOD1
M21	ACOX1
M21	CHKB
M21	TUFM
M21	DHRS9
M21	VAV1
M21	SOD1
M21	TOP2A
M21	TYR
M26	CPA4
M26	C1QBP
M26	NUP214
M26	GSK3B
M26	UNC45A
M26	VAV1
M3	ADORA1
M3	TYMS
M3	ADORA2A
M3	FOLR1
M3	GART
M3	GOT2
M3	TRIM5
M3	CPA4
M3	CHKB
M3	CUEDC2
M3	POU4F1
M3	TUFM
M3	DHRS9
M36	CPA4
M36	POU4F1
M36	TPI1
M36	SPAG9
M36	VAV1
M36	SOD1
M36	TOX
M36	TYR
M55	GOT2
M55	CHKB
M55	POLD3
M55	POU4F1
M55	TUFM
M55	IGLC1
M55	NEU1
M55	SOD1
M55	TOP2A
M55	SRC
P15	CPA4
P15	POU4F1
P15	HBA1
P15	LDHB
P15	SOD1
P15	TOP2A
P15	UPRT
P15	EGFR
P15	ADORA1
P15	ADORA2A
P15	HSD17B2
P15	CA7
P15	CA12
P15	CA4
P15	HSD17B1
P15	ESR2
P15	ESR1
P15	PTPRS
P15	CYP19A1
P15	ALOX12
P15	IL2
P15	CBR1
P15	ESRRA
P15	ABCG2
P15	ABCB1
P15	XDH
P15	MAOA
P15	PFKFB3
P15	TYR
P15	TBXAS1
P15	MGAM
P15	HTR2A
P15	HTR2C
P15	ESRRB
P15	PTGS1
P15	SLC6A2
P15	ALDH2
P15	NOX4
P15	PIM1
P15	PPARA
P15	ALOX15
P15	ACHE
P15	AKR1B1
P15	CA2
P15	TLR9
P15	MIF
P15	PON1
P15	CA1
P15	BACE1
P15	MCL1
P15	SNCA
P15	IGFBP6
P15	IGFBP4
P15	IGFBP5
P15	IGFBP2
P15	IGFBP3
P15	IGFBP1
P15	PRSS1
P15	F10
P15	PLAU
P15	STS
P15	BAD
P15	HSP90B1
P6	POU4F1
P6	GPI
P6	KMT2A
P6	TPI1
P6	SPAG9
P6	SOD1
P6	TOX
P6	TAGLN2
P6	IL2
P6	TNF
P6	ALDH2
P6	ADORA1
P6	AKR1B1
P6	CA13
P6	XDH
P6	CA1
P6	CA12
P6	CA9
P6	MMP2
P6	MMP12
P6	HSP90AA1
P6	CA2
P6	CA7

## Sheet: Disease-Target
Disease	Target
Alcoholic Liver Disease	ACOT11
Alcoholic Liver Disease	ACOT7
Alcoholic Liver Disease	ACSL1
Alcoholic Liver Disease	ACSL3
Alcoholic Liver Disease	ACSL4
Alcoholic Liver Disease	ACSL5
Alcoholic Liver Disease	ACSL6
Alcoholic Liver Disease	ACSM2B
Alcoholic Liver Disease	ADH1B
Alcoholic Liver Disease	ADH1C
Alcoholic Liver Disease	ALDH1A1
Alcoholic Liver Disease	ALDH3A2
Alcoholic Liver Disease	ALPL
Alcoholic Liver Disease	ARG1
Alcoholic Liver Disease	ARV1
Alcoholic Liver Disease	ASAP3
Alcoholic Liver Disease	CCL16
Alcoholic Liver Disease	CD36
Alcoholic Liver Disease	CDH1
Alcoholic Liver Disease	CDH17
Alcoholic Liver Disease	CEBPB
Alcoholic Liver Disease	CES1
Alcoholic Liver Disease	CHD1L
Alcoholic Liver Disease	CIDEC
Alcoholic Liver Disease	CLEC4G
Alcoholic Liver Disease	CLEC4M
Alcoholic Liver Disease	COLEC10
Alcoholic Liver Disease	COX6A1
Alcoholic Liver Disease	COX7A2
Alcoholic Liver Disease	CPT1A
Alcoholic Liver Disease	CTRC
Alcoholic Liver Disease	CYP4A11
Alcoholic Liver Disease	CYP4F2
Alcoholic Liver Disease	DLC1
Alcoholic Liver Disease	DNAJB4
Alcoholic Liver Disease	DRD2
Alcoholic Liver Disease	DRD4
Alcoholic Liver Disease	ELOVL1
Alcoholic Liver Disease	ELOVL2
Alcoholic Liver Disease	ELOVL3
Alcoholic Liver Disease	ELOVL4
Alcoholic Liver Disease	ELOVL5
Alcoholic Liver Disease	ELOVL6
Alcoholic Liver Disease	ELOVL7
Alcoholic Liver Disease	FA2H
Alcoholic Liver Disease	FAAH
Alcoholic Liver Disease	FAAH2
Alcoholic Liver Disease	FAAHP1
Alcoholic Liver Disease	FABP1
Alcoholic Liver Disease	FABP2
Alcoholic Liver Disease	FABP3
Alcoholic Liver Disease	FABP4
Alcoholic Liver Disease	FABP5
Alcoholic Liver Disease	FABP6
Alcoholic Liver Disease	FABP7
Alcoholic Liver Disease	FADS1
Alcoholic Liver Disease	FADS2
Alcoholic Liver Disease	FADS3
Alcoholic Liver Disease	FAR1
Alcoholic Liver Disease	FAR2
Alcoholic Liver Disease	FASN
Alcoholic Liver Disease	FAT1
Alcoholic Liver Disease	FAT2
Alcoholic Liver Disease	FAT3
Alcoholic Liver Disease	FAT4
Alcoholic Liver Disease	FBP1
Alcoholic Liver Disease	FFAR1
Alcoholic Liver Disease	FFAR2
Alcoholic Liver Disease	FFAR3
Alcoholic Liver Disease	FFAR4
Alcoholic Liver Disease	FITM1
Alcoholic Liver Disease	FITM2
Alcoholic Liver Disease	FMO1
Alcoholic Liver Disease	FMO4
Alcoholic Liver Disease	FTO
Alcoholic Liver Disease	GCK
Alcoholic Liver Disease	GFER
Alcoholic Liver Disease	GJB1
Alcoholic Liver Disease	GLDN
Alcoholic Liver Disease	GLS2
Alcoholic Liver Disease	GPT
Alcoholic Liver Disease	GSTA2
Alcoholic Liver Disease	GSTM1
Alcoholic Liver Disease	GSTP1
Alcoholic Liver Disease	GYS2
Alcoholic Liver Disease	HADHA
Alcoholic Liver Disease	HAMP
Alcoholic Liver Disease	HNF1B
Alcoholic Liver Disease	HSD17B4
Alcoholic Liver Disease	HULC
Alcoholic Liver Disease	IL10
Alcoholic Liver Disease	INSR
Alcoholic Liver Disease	LACC1
Alcoholic Liver Disease	LCO
Alcoholic Liver Disease	LEAP2
Alcoholic Liver Disease	LEP
Alcoholic Liver Disease	MAT1A
Alcoholic Liver Disease	MEIS1
Alcoholic Liver Disease	MFGE8
Alcoholic Liver Disease	MIR212
Alcoholic Liver Disease	MRAP
Alcoholic Liver Disease	NAP1L5
Alcoholic Liver Disease	NR1H3
Alcoholic Liver Disease	NR5A2
Alcoholic Liver Disease	OIT3
Alcoholic Liver Disease	PFKFB1
Alcoholic Liver Disease	PFKL
Alcoholic Liver Disease	PHKA2
Alcoholic Liver Disease	PHKG2
Alcoholic Liver Disease	PHLDA2
Alcoholic Liver Disease	PIANP
Alcoholic Liver Disease	PKLR
Alcoholic Liver Disease	PNPLA3
Alcoholic Liver Disease	PPARD
Alcoholic Liver Disease	PPARG
Alcoholic Liver Disease	PPARGC1A
Alcoholic Liver Disease	PPP1R3B
Alcoholic Liver Disease	PRKCE
Alcoholic Liver Disease	PTP4A1
Alcoholic Liver Disease	PTP4A2
Alcoholic Liver Disease	PYGL
Alcoholic Liver Disease	RBP4
Alcoholic Liver Disease	SEPSECS
Alcoholic Liver Disease	SLC25A6
Alcoholic Liver Disease	SLC27A1
Alcoholic Liver Disease	SLC27A2
Alcoholic Liver Disease	SLC27A3
Alcoholic Liver Disease	SLC27A4
Alcoholic Liver Disease	SLC27A5
Alcoholic Liver Disease	SLC27A6
Alcoholic Liver Disease	SLC2A2
Alcoholic Liver Disease	SLC6A3
Alcoholic Liver Disease	SLCO1B1
Alcoholic Liver Disease	SNCA
Alcoholic Liver Disease	SPTBN1
Alcoholic Liver Disease	SREBF1
Alcoholic Liver Disease	STARD13
Alcoholic Liver Disease	STARD8
Alcoholic Liver Disease	SULT1E1
Alcoholic Liver Disease	TJP1
Alcoholic Liver Disease	TM4SF4
Alcoholic Liver Disease	TMEM59
Alcoholic Liver Disease	USP9X
Alcoholic Liver Disease	USP9Y
Alcoholic Liver Disease	ZNF367
Alcoholic Liver Disease	A1CF
Alcoholic Liver Disease	A2M
Alcoholic Liver Disease	A2MP1
Alcoholic Liver Disease	AADAC
Alcoholic Liver Disease	AARS1
Alcoholic Liver Disease	AARS2
Alcoholic Liver Disease	AASS
Alcoholic Liver Disease	AB372775
Alcoholic Liver Disease	ABCA1
Alcoholic Liver Disease	ABCA2
Alcoholic Liver Disease	ABCA3
Alcoholic Liver Disease	ABCA4
Alcoholic Liver Disease	ABCA7
Alcoholic Liver Disease	ABCB1
Alcoholic Liver Disease	ABCB11
Alcoholic Liver Disease	ABCB4
Alcoholic Liver Disease	ABCB6
Alcoholic Liver Disease	ABCB7
Alcoholic Liver Disease	ABCC1
Alcoholic Liver Disease	ABCC11
Alcoholic Liver Disease	ABCC12
Alcoholic Liver Disease	ABCC2
Alcoholic Liver Disease	ABCC3
Alcoholic Liver Disease	ABCC6
Alcoholic Liver Disease	ABCC8
Alcoholic Liver Disease	ABCD1
Alcoholic Liver Disease	ABCD2
Alcoholic Liver Disease	ABCD3
Alcoholic Liver Disease	ABCG1
Alcoholic Liver Disease	ABCG2
Alcoholic Liver Disease	ABCG4
Alcoholic Liver Disease	ABCG5
Alcoholic Liver Disease	ABCG8
Alcoholic Liver Disease	ABHD12
Alcoholic Liver Disease	ABHD2
Alcoholic Liver Disease	ABHD6
Alcoholic Liver Disease	ABI1
Alcoholic Liver Disease	ABL1
Alcoholic Liver Disease	ABO
Alcoholic Liver Disease	ABRAXAS1
Alcoholic Liver Disease	ACAA2
Alcoholic Liver Disease	ACACA
Alcoholic Liver Disease	ACACB
Alcoholic Liver Disease	ACAD10
Alcoholic Liver Disease	ACAD9
Alcoholic Liver Disease	ACADM
Alcoholic Liver Disease	ACADS
Alcoholic Liver Disease	ACADSB
Alcoholic Liver Disease	ACADVL
Alcoholic Liver Disease	ACAN
Alcoholic Liver Disease	ACAT1
Alcoholic Liver Disease	ACAT2
Alcoholic Liver Disease	ACBD3
Alcoholic Liver Disease	ACBD4
Alcoholic Liver Disease	ACE
Alcoholic Liver Disease	ACE2
Alcoholic Liver Disease	ACER2
Alcoholic Liver Disease	ACER3
Alcoholic Liver Disease	ACHE
Alcoholic Liver Disease	ACLY
Alcoholic Liver Disease	ACO1
Alcoholic Liver Disease	ACO2
Alcoholic Liver Disease	ACOT11
Alcoholic Liver Disease	ACOX1
Alcoholic Liver Disease	ACOX3
Alcoholic Liver Disease	ACP1
Alcoholic Liver Disease	ACP2
Alcoholic Liver Disease	ACP4
Alcoholic Liver Disease	ACP5
Alcoholic Liver Disease	ACP6
Alcoholic Liver Disease	ACSF3
Alcoholic Liver Disease	ACSL3
Alcoholic Liver Disease	ACSL4
Alcoholic Liver Disease	ACSM2B
Alcoholic Liver Disease	ACSS1
Alcoholic Liver Disease	ACSS2
Alcoholic Liver Disease	ACSS3
Alcoholic Liver Disease	ACTA1
Alcoholic Liver Disease	ACTB
Alcoholic Liver Disease	ACTC1
Alcoholic Liver Disease	ACTG1
Alcoholic Liver Disease	ACTL6B
Alcoholic Liver Disease	ACTN2
Alcoholic Liver Disease	ACTN3
Alcoholic Liver Disease	ACTN4
Alcoholic Liver Disease	ACTR2
Alcoholic Liver Disease	ACTR3
Alcoholic Liver Disease	ACTR5
Alcoholic Liver Disease	ACVRL1
Alcoholic Liver Disease	ACY1
Alcoholic Liver Disease	ACYP2
Alcoholic Liver Disease	ADA
Alcoholic Liver Disease	ADA2
Alcoholic Liver Disease	ADAM10
Alcoholic Liver Disease	ADAM12
Alcoholic Liver Disease	ADAM17
Alcoholic Liver Disease	ADAMTS1
Alcoholic Liver Disease	ADAMTS13
Alcoholic Liver Disease	ADAMTS9
Alcoholic Liver Disease	ADAMTS9-AS2
Alcoholic Liver Disease	ADAMTSL1
Alcoholic Liver Disease	ADAR
Alcoholic Liver Disease	ADARB2-AS1
Alcoholic Liver Disease	ADCY1
Alcoholic Liver Disease	ADCY10
Alcoholic Liver Disease	ADCY5
Alcoholic Liver Disease	ADCY8
Alcoholic Liver Disease	ADCYAP1
Alcoholic Liver Disease	ADD1
Alcoholic Liver Disease	ADGRL2
Alcoholic Liver Disease	ADH1A
Alcoholic Liver Disease	ADH1B
Alcoholic Liver Disease	ADH1C
Alcoholic Liver Disease	ADH4
Alcoholic Liver Disease	ADH5
Alcoholic Liver Disease	ADH5P4
Alcoholic Liver Disease	ADH6
Alcoholic Liver Disease	ADH7
Alcoholic Liver Disease	ADHFE1
Alcoholic Liver Disease	ADIPOQ
Alcoholic Liver Disease	ADIPOR1
Alcoholic Liver Disease	ADIPOR2
Alcoholic Liver Disease	ADK
Alcoholic Liver Disease	ADM
Alcoholic Liver Disease	ADNP
Alcoholic Liver Disease	ADORA1
Alcoholic Liver Disease	ADORA3
Alcoholic Liver Disease	ADPRH
Alcoholic Liver Disease	ADRA2A
Alcoholic Liver Disease	ADRA2B
Alcoholic Liver Disease	ADRB1
Alcoholic Liver Disease	ADRB2
Alcoholic Liver Disease	ADRB3
Alcoholic Liver Disease	ADSL
Alcoholic Liver Disease	ADTRP
Alcoholic Liver Disease	AEBP1
Alcoholic Liver Disease	AFAP1
Alcoholic Liver Disease	AFAP1-AS1
Alcoholic Liver Disease	AFG3L2
Alcoholic Liver Disease	AFM
Alcoholic Liver Disease	AFP
Alcoholic Liver Disease	AGAP1
Alcoholic Liver Disease	AGER
Alcoholic Liver Disease	AGFG1
Alcoholic Liver Disease	AGK
Alcoholic Liver Disease	AGL
Alcoholic Liver Disease	AGMO
Alcoholic Liver Disease	AGO2
Alcoholic Liver Disease	AGPAT1
Alcoholic Liver Disease	AGPAT2
Alcoholic Liver Disease	AGPAT5
Alcoholic Liver Disease	AGPS
Alcoholic Liver Disease	AGR2
Alcoholic Liver Disease	AGR3
Alcoholic Liver Disease	AGRN
Alcoholic Liver Disease	AGRP
Alcoholic Liver Disease	AGT
Alcoholic Liver Disease	AGTR1
Alcoholic Liver Disease	AGTR2
Alcoholic Liver Disease	AGXT
Alcoholic Liver Disease	AHCY
Alcoholic Liver Disease	AHCYL1
Alcoholic Liver Disease	AHI1
Alcoholic Liver Disease	AHNAK
Alcoholic Liver Disease	AHR
Alcoholic Liver Disease	AHSA1
Alcoholic Liver Disease	AHSG
Alcoholic Liver Disease	AHSP
Alcoholic Liver Disease	AIF1
Alcoholic Liver Disease	AIFM1
Alcoholic Liver Disease	AIM2
Alcoholic Liver Disease	AIMP1
Alcoholic Liver Disease	AIMP2
Alcoholic Liver Disease	AIPL1
Alcoholic Liver Disease	AIRE
Alcoholic Liver Disease	AKAP13
Alcoholic Liver Disease	AKIP1
Alcoholic Liver Disease	AKR1A1
Alcoholic Liver Disease	AKR1B1
Alcoholic Liver Disease	AKR1B10
Alcoholic Liver Disease	AKR1C2
Alcoholic Liver Disease	AKR1C3
Alcoholic Liver Disease	AKR1C4
Alcoholic Liver Disease	AKR1D1
Alcoholic Liver Disease	AKT1
Alcoholic Liver Disease	AKT2
Alcoholic Liver Disease	AKT3
Alcoholic Liver Disease	ALAD
Alcoholic Liver Disease	ALAS1
Alcoholic Liver Disease	ALB
Alcoholic Liver Disease	ALCAM
Alcoholic Liver Disease	ALDH18A1
Alcoholic Liver Disease	ALDH1A1
Alcoholic Liver Disease	ALDH1A2
Alcoholic Liver Disease	ALDH1B1
Alcoholic Liver Disease	ALDH1L1
Alcoholic Liver Disease	ALDH2
Alcoholic Liver Disease	ALDH3A1
Alcoholic Liver Disease	ALDH3A2
Alcoholic Liver Disease	ALDH3B1
Alcoholic Liver Disease	ALDH4A1
Alcoholic Liver Disease	ALDH5A1
Alcoholic Liver Disease	ALDH6A1
Alcoholic Liver Disease	ALDH7A1
Alcoholic Liver Disease	ALDH8A1
Alcoholic Liver Disease	ALDH9A1
Alcoholic Liver Disease	ALDOA
Alcoholic Liver Disease	ALDOB
Alcoholic Liver Disease	ALG8
Alcoholic Liver Disease	ALK
Alcoholic Liver Disease	ALMS1
Alcoholic Liver Disease	ALOX12
Alcoholic Liver Disease	ALOX15
Alcoholic Liver Disease	ALOX15B
Alcoholic Liver Disease	ALOX5
Alcoholic Liver Disease	ALOX5AP
Alcoholic Liver Disease	ALOXE3
Alcoholic Liver Disease	ALPG
Alcoholic Liver Disease	ALPI
Alcoholic Liver Disease	ALPL
Alcoholic Liver Disease	ALPP
Alcoholic Liver Disease	ALS2
Alcoholic Liver Disease	ALX1
Alcoholic Liver Disease	AMACR
Alcoholic Liver Disease	AMBP
Alcoholic Liver Disease	AMFR
Alcoholic Liver Disease	AMH
Alcoholic Liver Disease	AMPD3
Alcoholic Liver Disease	AMPH
Alcoholic Liver Disease	AMPK
Alcoholic Liver Disease	AMY1A
Alcoholic Liver Disease	ANAPC5
Alcoholic Liver Disease	ANGPT1
Alcoholic Liver Disease	ANGPT2
Alcoholic Liver Disease	ANGPTL2
Alcoholic Liver Disease	ANGPTL3
Alcoholic Liver Disease	ANGPTL4
Alcoholic Liver Disease	ANGPTL8
Alcoholic Liver Disease	ANK2
Alcoholic Liver Disease	ANKHD1
Alcoholic Liver Disease	ANKK1
Alcoholic Liver Disease	ANKLE2
Alcoholic Liver Disease	ANKRD26
Alcoholic Liver Disease	ANKRD30A
Alcoholic Liver Disease	ANO1
Alcoholic Liver Disease	ANO10
Alcoholic Liver Disease	ANO5
Alcoholic Liver Disease	ANOS1
Alcoholic Liver Disease	ANP32A
Alcoholic Liver Disease	ANPEP
Alcoholic Liver Disease	ANTXR2
Alcoholic Liver Disease	ANXA1
Alcoholic Liver Disease	ANXA2
Alcoholic Liver Disease	ANXA3
Alcoholic Liver Disease	ANXA4
Alcoholic Liver Disease	ANXA5
Alcoholic Liver Disease	ANXA6
Alcoholic Liver Disease	ANXA7
Alcoholic Liver Disease	ANXA9
Alcoholic Liver Disease	AOC1
Alcoholic Liver Disease	AOC3
Alcoholic Liver Disease	AOX1
Alcoholic Liver Disease	AP1B1
Alcoholic Liver Disease	AP1S3
Alcoholic Liver Disease	AP2A1
Alcoholic Liver Disease	AP2A2
Alcoholic Liver Disease	AP2B1
Alcoholic Liver Disease	AP2M1
Alcoholic Liver Disease	APAF1
Alcoholic Liver Disease	APC
Alcoholic Liver Disease	APEX1
Alcoholic Liver Disease	APH1A
Alcoholic Liver Disease	APLN
Alcoholic Liver Disease	APLNR
Alcoholic Liver Disease	APLP2
Alcoholic Liver Disease	APOA1
Alcoholic Liver Disease	APOA2
Alcoholic Liver Disease	APOA4
Alcoholic Liver Disease	APOA5
Alcoholic Liver Disease	APOB
Alcoholic Liver Disease	APOBEC1
Alcoholic Liver Disease	APOBEC3B
Alcoholic Liver Disease	APOBEC3G
Alcoholic Liver Disease	APOBR
Alcoholic Liver Disease	APOC1
Alcoholic Liver Disease	APOC2
Alcoholic Liver Disease	APOC3
Alcoholic Liver Disease	APOC4
Alcoholic Liver Disease	APOD
Alcoholic Liver Disease	APOE
Alcoholic Liver Disease	APOF
Alcoholic Liver Disease	APOH
Alcoholic Liver Disease	APOL1
Alcoholic Liver Disease	APOL2
Alcoholic Liver Disease	APOL5
Alcoholic Liver Disease	APOL6
Alcoholic Liver Disease	APOM
Alcoholic Liver Disease	APP
Alcoholic Liver Disease	APPBP2
Alcoholic Liver Disease	APPL1
Alcoholic Liver Disease	APPL2
Alcoholic Liver Disease	APRT
Alcoholic Liver Disease	APTX
Alcoholic Liver Disease	AQP1
Alcoholic Liver Disease	AQP3
Alcoholic Liver Disease	AQP4
Alcoholic Liver Disease	AQP5
Alcoholic Liver Disease	AQP7
Alcoholic Liver Disease	AQP9
Alcoholic Liver Disease	AR
Alcoholic Liver Disease	ARAF
Alcoholic Liver Disease	ARCN1
Alcoholic Liver Disease	AREG
Alcoholic Liver Disease	ARF1
Alcoholic Liver Disease	ARF4
Alcoholic Liver Disease	ARF6
Alcoholic Liver Disease	ARFGEF3
Alcoholic Liver Disease	ARG1
Alcoholic Liver Disease	ARHGAP1
Alcoholic Liver Disease	ARHGAP24
Alcoholic Liver Disease	ARHGAP8
Alcoholic Liver Disease	ARHGDIA
Alcoholic Liver Disease	ARHGEF1
Alcoholic Liver Disease	ARHGEF2
Alcoholic Liver Disease	ARHGEF7
Alcoholic Liver Disease	ARID1A
Alcoholic Liver Disease	ARID1B
Alcoholic Liver Disease	ARID2
Alcoholic Liver Disease	ARID3B
Alcoholic Liver Disease	ARID4B
Alcoholic Liver Disease	ARL13B
Alcoholic Liver Disease	ARL15
Alcoholic Liver Disease	ARL2BPP6
Alcoholic Liver Disease	ARL6
Alcoholic Liver Disease	ARNT
Alcoholic Liver Disease	ARNT2
Alcoholic Liver Disease	ARNTL
Alcoholic Liver Disease	ARPC1A
Alcoholic Liver Disease	ARPC1B
Alcoholic Liver Disease	ARPC2
Alcoholic Liver Disease	ARPC4
Alcoholic Liver Disease	ARRB1
Alcoholic Liver Disease	ARRB2
Alcoholic Liver Disease	ARRDC3
Alcoholic Liver Disease	ARSA
Alcoholic Liver Disease	ARSB
Alcoholic Liver Disease	ARSH
Alcoholic Liver Disease	ARV1
Alcoholic Liver Disease	ARVCF
Alcoholic Liver Disease	ARX
Alcoholic Liver Disease	ASAH1
Alcoholic Liver Disease	ASAH2
Alcoholic Liver Disease	ASAH2B
Alcoholic Liver Disease	ASCC1
Alcoholic Liver Disease	ASCL1
Alcoholic Liver Disease	ASGR1
Alcoholic Liver Disease	ASGR2
Alcoholic Liver Disease	ASL
Alcoholic Liver Disease	ASNS
Alcoholic Liver Disease	ASPA
Alcoholic Liver Disease	ASPG
Alcoholic Liver Disease	ASPM
Alcoholic Liver Disease	ASRGL1
Alcoholic Liver Disease	ASS1
Alcoholic Liver Disease	ASXL2
Alcoholic Liver Disease	ASXL3
Alcoholic Liver Disease	ATAD1
Alcoholic Liver Disease	ATAD2
Alcoholic Liver Disease	ATAD3A
Alcoholic Liver Disease	ATF1
Alcoholic Liver Disease	ATF2
Alcoholic Liver Disease	ATF3
Alcoholic Liver Disease	ATF4
Alcoholic Liver Disease	ATF6
Alcoholic Liver Disease	ATG14
Alcoholic Liver Disease	ATG5
Alcoholic Liver Disease	ATG7
Alcoholic Liver Disease	ATHS
Alcoholic Liver Disease	ATIC
Alcoholic Liver Disease	ATL1
Alcoholic Liver Disease	ATM
Alcoholic Liver Disease	ATN1
Alcoholic Liver Disease	ATOX1
Alcoholic Liver Disease	ATP10D
Alcoholic Liver Disease	ATP12A
Alcoholic Liver Disease	ATP13A2
Alcoholic Liver Disease	ATP1A1
Alcoholic Liver Disease	ATP2A1
Alcoholic Liver Disease	ATP2A2
Alcoholic Liver Disease	ATP2B1
Alcoholic Liver Disease	ATP2B4
Alcoholic Liver Disease	ATP2C1
Alcoholic Liver Disease	ATP4A
Alcoholic Liver Disease	ATP5F1A
Alcoholic Liver Disease	ATP5F1B
Alcoholic Liver Disease	ATP5F1C
Alcoholic Liver Disease	ATP5F1E
Alcoholic Liver Disease	ATP5MD
Alcoholic Liver Disease	ATP5PO
Alcoholic Liver Disease	ATP6AP2
Alcoholic Liver Disease	ATP6V0A2
Alcoholic Liver Disease	ATP7A
Alcoholic Liver Disease	ATP7B
Alcoholic Liver Disease	ATP8A1
Alcoholic Liver Disease	ATP8B1
Alcoholic Liver Disease	ATR
Alcoholic Liver Disease	ATRX
Alcoholic Liver Disease	ATXN10
Alcoholic Liver Disease	ATXN2
Alcoholic Liver Disease	ATXN2L
Alcoholic Liver Disease	ATXN3
Alcoholic Liver Disease	AUP1
Alcoholic Liver Disease	AURKA
Alcoholic Liver Disease	AURKB
Alcoholic Liver Disease	AUTS2
Alcoholic Liver Disease	AVEN
Alcoholic Liver Disease	AVP
Alcoholic Liver Disease	AWAT1
Alcoholic Liver Disease	AWAT2
Alcoholic Liver Disease	AXIN1
Alcoholic Liver Disease	AXIN2
Alcoholic Liver Disease	AXL
Alcoholic Liver Disease	AZIN2
Alcoholic Liver Disease	AZU1
Alcoholic Liver Disease	B2M
Alcoholic Liver Disease	B3GALT4
Alcoholic Liver Disease	B3GAT1
Alcoholic Liver Disease	B4GALT6
Alcoholic Liver Disease	B9D1
Alcoholic Liver Disease	B9D2
Alcoholic Liver Disease	BACE1
Alcoholic Liver Disease	BACH1
Alcoholic Liver Disease	BAD
Alcoholic Liver Disease	BAG1
Alcoholic Liver Disease	BAG2
Alcoholic Liver Disease	BAIAP2L1
Alcoholic Liver Disease	BAK1
Alcoholic Liver Disease	BANP
Alcoholic Liver Disease	BAP1
Alcoholic Liver Disease	BARD1
Alcoholic Liver Disease	BASP1
Alcoholic Liver Disease	BAX
Alcoholic Liver Disease	BBC3
Alcoholic Liver Disease	BBIP1
Alcoholic Liver Disease	BBS1
Alcoholic Liver Disease	BBS10
Alcoholic Liver Disease	BBS12
Alcoholic Liver Disease	BBS2
Alcoholic Liver Disease	BBS4
Alcoholic Liver Disease	BBS5
Alcoholic Liver Disease	BBS7
Alcoholic Liver Disease	BBS9
Alcoholic Liver Disease	BCAP31
Alcoholic Liver Disease	BCAR1
Alcoholic Liver Disease	BCAR3
Alcoholic Liver Disease	BCAR4
Alcoholic Liver Disease	BCAS1
Alcoholic Liver Disease	BCAS2
Alcoholic Liver Disease	BCAS3
Alcoholic Liver Disease	BCAT1
Alcoholic Liver Disease	BCHE
Alcoholic Liver Disease	BCL10
Alcoholic Liver Disease	BCL11B
Alcoholic Liver Disease	BCL2
Alcoholic Liver Disease	BCL2A1
Alcoholic Liver Disease	BCL2L1
Alcoholic Liver Disease	BCL2L11
Alcoholic Liver Disease	BCL2L15
Alcoholic Liver Disease	BCL3
Alcoholic Liver Disease	BCL6
Alcoholic Liver Disease	BCO1
Alcoholic Liver Disease	BCOR
Alcoholic Liver Disease	BCORL1
Alcoholic Liver Disease	BCR
Alcoholic Liver Disease	BCS1L
Alcoholic Liver Disease	BCYRN1
Alcoholic Liver Disease	BDH1
Alcoholic Liver Disease	BDH2
Alcoholic Liver Disease	BDKRB2
Alcoholic Liver Disease	BDNF
Alcoholic Liver Disease	BECN1
Alcoholic Liver Disease	BECN2
Alcoholic Liver Disease	BEST1
Alcoholic Liver Disease	BEX2
Alcoholic Liver Disease	BFAR
Alcoholic Liver Disease	BGLAP
Alcoholic Liver Disease	BGN
Alcoholic Liver Disease	BHLHE41
Alcoholic Liver Disease	BHMT
Alcoholic Liver Disease	BICC1
Alcoholic Liver Disease	BID
Alcoholic Liver Disease	BIN1
Alcoholic Liver Disease	BIRC2
Alcoholic Liver Disease	BIRC3
Alcoholic Liver Disease	BIRC5
Alcoholic Liver Disease	BIRC6
Alcoholic Liver Disease	BLK
Alcoholic Liver Disease	BLMH
Alcoholic Liver Disease	BLOC1S1
Alcoholic Liver Disease	BLOC1S3
Alcoholic Liver Disease	BLVRA
Alcoholic Liver Disease	BLVRB
Alcoholic Liver Disease	BLZF1
Alcoholic Liver Disease	BMI1
Alcoholic Liver Disease	BMP1
Alcoholic Liver Disease	BMP10
Alcoholic Liver Disease	BMP2
Alcoholic Liver Disease	BMP4
Alcoholic Liver Disease	BMP6
Alcoholic Liver Disease	BMP7
Alcoholic Liver Disease	BMP8B
Alcoholic Liver Disease	BMPR1A
Alcoholic Liver Disease	BMPR1B
Alcoholic Liver Disease	BMPR2
Alcoholic Liver Disease	BNC1
Alcoholic Liver Disease	BNIP3
Alcoholic Liver Disease	BPI
Alcoholic Liver Disease	BPIFA4P
Alcoholic Liver Disease	BPTF
Alcoholic Liver Disease	BRAF
Alcoholic Liver Disease	BRAP
Alcoholic Liver Disease	BRCA1
Alcoholic Liver Disease	BRCA2
Alcoholic Liver Disease	BRF1
Alcoholic Liver Disease	BRIP1
Alcoholic Liver Disease	BRMS1
Alcoholic Liver Disease	BRMS1L
Alcoholic Liver Disease	BSCL2
Alcoholic Liver Disease	BSG
Alcoholic Liver Disease	BST2
Alcoholic Liver Disease	BTD
Alcoholic Liver Disease	BTG1
Alcoholic Liver Disease	BTK
Alcoholic Liver Disease	BTN2A1
Alcoholic Liver Disease	BTN2A2
Alcoholic Liver Disease	BUB1
Alcoholic Liver Disease	BUB1B
Alcoholic Liver Disease	C12orf43
Alcoholic Liver Disease	C12orf57
Alcoholic Liver Disease	C15orf41
Alcoholic Liver Disease	C16orf95
Alcoholic Liver Disease	C19orf12
Alcoholic Liver Disease	C1orf87
Alcoholic Liver Disease	C1QTNF1
Alcoholic Liver Disease	C1QTNF3
Alcoholic Liver Disease	C1QTNF9
Alcoholic Liver Disease	C1R
Alcoholic Liver Disease	C1S
Alcoholic Liver Disease	C2orf16
Alcoholic Liver Disease	C3
Alcoholic Liver Disease	C4A
Alcoholic Liver Disease	C4BPA
Alcoholic Liver Disease	C5
Alcoholic Liver Disease	C5AR1
Alcoholic Liver Disease	C5AR2
Alcoholic Liver Disease	C5orf67
Alcoholic Liver Disease	C9orf72
Alcoholic Liver Disease	CA1
Alcoholic Liver Disease	CA2
Alcoholic Liver Disease	CA3
Alcoholic Liver Disease	CA9
Alcoholic Liver Disease	CABIN1
Alcoholic Liver Disease	CACNA1A
Alcoholic Liver Disease	CACNA1C
Alcoholic Liver Disease	CACNA1D
Alcoholic Liver Disease	CACNA1F
Alcoholic Liver Disease	CACNA1G
Alcoholic Liver Disease	CACNA1H
Alcoholic Liver Disease	CACNA1S
Alcoholic Liver Disease	CACNA2D1
Alcoholic Liver Disease	CAD
Alcoholic Liver Disease	CADM2
Alcoholic Liver Disease	CADPS
Alcoholic Liver Disease	CALB2
Alcoholic Liver Disease	CALCA
Alcoholic Liver Disease	CALCOCO1
Alcoholic Liver Disease	CALD1
Alcoholic Liver Disease	CALM1
Alcoholic Liver Disease	CALR
Alcoholic Liver Disease	CAMK2D
Alcoholic Liver Disease	CAMK2G
Alcoholic Liver Disease	CAMK4
Alcoholic Liver Disease	CAMKK2
Alcoholic Liver Disease	CAMKMT
Alcoholic Liver Disease	CAMP
Alcoholic Liver Disease	CAMTA1
Alcoholic Liver Disease	CAND1
Alcoholic Liver Disease	CANT1
Alcoholic Liver Disease	CANX
Alcoholic Liver Disease	CAPN1
Alcoholic Liver Disease	CAPN10
Alcoholic Liver Disease	CAPN2
Alcoholic Liver Disease	CAPN3
Alcoholic Liver Disease	CAPSL
Alcoholic Liver Disease	CAPZA1
Alcoholic Liver Disease	CAPZA2
Alcoholic Liver Disease	CAPZB
Alcoholic Liver Disease	CARD6
Alcoholic Liver Disease	CARTPT
Alcoholic Liver Disease	CASC2
Alcoholic Liver Disease	CASC22
Alcoholic Liver Disease	CASK
Alcoholic Liver Disease	CASP1
Alcoholic Liver Disease	CASP10
Alcoholic Liver Disease	CASP2
Alcoholic Liver Disease	CASP3
Alcoholic Liver Disease	CASP4
Alcoholic Liver Disease	CASP6
Alcoholic Liver Disease	CASP7
Alcoholic Liver Disease	CASP8
Alcoholic Liver Disease	CASP9
Alcoholic Liver Disease	CASQ1
Alcoholic Liver Disease	CASR
Alcoholic Liver Disease	CAST
Alcoholic Liver Disease	CAT
Alcoholic Liver Disease	CAV1
Alcoholic Liver Disease	CAV2
Alcoholic Liver Disease	CAV3
Alcoholic Liver Disease	CBFB
Alcoholic Liver Disease	CBL
Alcoholic Liver Disease	CBR1
Alcoholic Liver Disease	CBR4
Alcoholic Liver Disease	CBS
Alcoholic Liver Disease	CBX5
Alcoholic Liver Disease	CC2D2A
Alcoholic Liver Disease	CCAR2
Alcoholic Liver Disease	CCAT1
Alcoholic Liver Disease	CCAT2
Alcoholic Liver Disease	CCDC141
Alcoholic Liver Disease	CCDC170
Alcoholic Liver Disease	CCDC26
Alcoholic Liver Disease	CCDC47
Alcoholic Liver Disease	CCDC88A
Alcoholic Liver Disease	CCHCR1
Alcoholic Liver Disease	CCK
Alcoholic Liver Disease	CCKAR
Alcoholic Liver Disease	CCKBR
Alcoholic Liver Disease	CCL1
Alcoholic Liver Disease	CCL11
Alcoholic Liver Disease	CCL13
Alcoholic Liver Disease	CCL17
Alcoholic Liver Disease	CCL18
Alcoholic Liver Disease	CCL19
Alcoholic Liver Disease	CCL2
Alcoholic Liver Disease	CCL20
Alcoholic Liver Disease	CCL22
Alcoholic Liver Disease	CCL24
Alcoholic Liver Disease	CCL26
Alcoholic Liver Disease	CCL27
Alcoholic Liver Disease	CCL28
Alcoholic Liver Disease	CCL3
Alcoholic Liver Disease	CCL4
Alcoholic Liver Disease	CCL5
Alcoholic Liver Disease	CCL7
Alcoholic Liver Disease	CCN1
Alcoholic Liver Disease	CCN2
Alcoholic Liver Disease	CCN4
Alcoholic Liver Disease	CCNA1
Alcoholic Liver Disease	CCNA2
Alcoholic Liver Disease	CCNB1
Alcoholic Liver Disease	CCNB2
Alcoholic Liver Disease	CCNC
Alcoholic Liver Disease	CCND1
Alcoholic Liver Disease	CCND2
Alcoholic Liver Disease	CCND3
Alcoholic Liver Disease	CCNE1
Alcoholic Liver Disease	CCNE2
Alcoholic Liver Disease	CCNG1
Alcoholic Liver Disease	CCNH
Alcoholic Liver Disease	CCNK
Alcoholic Liver Disease	CCNT2
Alcoholic Liver Disease	CCR1
Alcoholic Liver Disease	CCR2
Alcoholic Liver Disease	CCR3
Alcoholic Liver Disease	CCR4
Alcoholic Liver Disease	CCR5
Alcoholic Liver Disease	CCR6
Alcoholic Liver Disease	CCR7
Alcoholic Liver Disease	CCRL2
Alcoholic Liver Disease	CCSER1
Alcoholic Liver Disease	CCT2
Alcoholic Liver Disease	CCT3
Alcoholic Liver Disease	CCT4
Alcoholic Liver Disease	CCT5
Alcoholic Liver Disease	CCT6A
Alcoholic Liver Disease	CCT7
Alcoholic Liver Disease	CCT8
Alcoholic Liver Disease	CD14
Alcoholic Liver Disease	CD151
Alcoholic Liver Disease	CD163
Alcoholic Liver Disease	CD19
Alcoholic Liver Disease	CD1C
Alcoholic Liver Disease	CD1D
Alcoholic Liver Disease	CD2
Alcoholic Liver Disease	CD22
Alcoholic Liver Disease	CD24
Alcoholic Liver Disease	CD247
Alcoholic Liver Disease	CD27
Alcoholic Liver Disease	CD274
Alcoholic Liver Disease	CD276
Alcoholic Liver Disease	CD28
Alcoholic Liver Disease	CD33
Alcoholic Liver Disease	CD34
Alcoholic Liver Disease	CD36
Alcoholic Liver Disease	CD38
Alcoholic Liver Disease	CD3EAP
Alcoholic Liver Disease	CD4
Alcoholic Liver Disease	CD40
Alcoholic Liver Disease	CD40LG
Alcoholic Liver Disease	CD44
Alcoholic Liver Disease	CD46
Alcoholic Liver Disease	CD47
Alcoholic Liver Disease	CD5
Alcoholic Liver Disease	CD55
Alcoholic Liver Disease	CD58
Alcoholic Liver Disease	CD59
Alcoholic Liver Disease	CD5L
Alcoholic Liver Disease	CD68
Alcoholic Liver Disease	CD69
Alcoholic Liver Disease	CD74
Alcoholic Liver Disease	CD79A
Alcoholic Liver Disease	CD80
Alcoholic Liver Disease	CD82
Alcoholic Liver Disease	CD83
Alcoholic Liver Disease	CD86
Alcoholic Liver Disease	CD8A
Alcoholic Liver Disease	CD9
Alcoholic Liver Disease	CDC25A
Alcoholic Liver Disease	CDC25B
Alcoholic Liver Disease	CDC25C
Alcoholic Liver Disease	CDC27
Alcoholic Liver Disease	CDC34
Alcoholic Liver Disease	CDC42
Alcoholic Liver Disease	CDC45
Alcoholic Liver Disease	CDC6
Alcoholic Liver Disease	CDCA7
Alcoholic Liver Disease	CDH1
Alcoholic Liver Disease	CDH11
Alcoholic Liver Disease	CDH13
Alcoholic Liver Disease	CDH2
Alcoholic Liver Disease	CDH23
Alcoholic Liver Disease	CDH3
Alcoholic Liver Disease	CDH4
Alcoholic Liver Disease	CDH5
Alcoholic Liver Disease	CDH8
Alcoholic Liver Disease	CDIPT
Alcoholic Liver Disease	CDK1
Alcoholic Liver Disease	CDK13
Alcoholic Liver Disease	CDK2
Alcoholic Liver Disease	CDK4
Alcoholic Liver Disease	CDK5
Alcoholic Liver Disease	CDK5RAP2
Alcoholic Liver Disease	CDK6
Alcoholic Liver Disease	CDK7
Alcoholic Liver Disease	CDK8
Alcoholic Liver Disease	CDK9
Alcoholic Liver Disease	CDKAL1
Alcoholic Liver Disease	CDKL5
Alcoholic Liver Disease	CDKN1A
Alcoholic Liver Disease	CDKN1B
Alcoholic Liver Disease	CDKN1C
Alcoholic Liver Disease	CDKN2A
Alcoholic Liver Disease	CDKN2B
Alcoholic Liver Disease	CDKN2B-AS1
Alcoholic Liver Disease	CDKN2C
Alcoholic Liver Disease	CDKN3
Alcoholic Liver Disease	CDR1-AS
Alcoholic Liver Disease	CDR2
Alcoholic Liver Disease	CDSN
Alcoholic Liver Disease	CDT1
Alcoholic Liver Disease	CDX1
Alcoholic Liver Disease	CDX2
Alcoholic Liver Disease	CDYL
Alcoholic Liver Disease	CEACAM1
Alcoholic Liver Disease	CEACAM5
Alcoholic Liver Disease	CEBPA
Alcoholic Liver Disease	CEBPB
Alcoholic Liver Disease	CEBPD
Alcoholic Liver Disease	CEL
Alcoholic Liver Disease	CELA2A
Alcoholic Liver Disease	CENPE
Alcoholic Liver Disease	CENPJ
Alcoholic Liver Disease	CEP104
Alcoholic Liver Disease	CEP135
Alcoholic Liver Disease	CEP152
Alcoholic Liver Disease	CEP170
Alcoholic Liver Disease	CEP290
Alcoholic Liver Disease	CEP41
Alcoholic Liver Disease	CEP85L
Alcoholic Liver Disease	CEPT1
Alcoholic Liver Disease	CERK
Alcoholic Liver Disease	CERKL
Alcoholic Liver Disease	CERNA2
Alcoholic Liver Disease	CERS1
Alcoholic Liver Disease	CERS2
Alcoholic Liver Disease	CERS6
Alcoholic Liver Disease	CERT1
Alcoholic Liver Disease	CES1
Alcoholic Liver Disease	CES2
Alcoholic Liver Disease	CES3
Alcoholic Liver Disease	CES5A
Alcoholic Liver Disease	CETP
Alcoholic Liver Disease	CFB
Alcoholic Liver Disease	CFD
Alcoholic Liver Disease	CFH
Alcoholic Liver Disease	CFI
Alcoholic Liver Disease	CFL1
Alcoholic Liver Disease	CFLAR
Alcoholic Liver Disease	CFP
Alcoholic Liver Disease	CFTR
Alcoholic Liver Disease	CGA
Alcoholic Liver Disease	CGB5
Alcoholic Liver Disease	CH25H
Alcoholic Liver Disease	CHAT
Alcoholic Liver Disease	CHCHD10
Alcoholic Liver Disease	CHCHD3
Alcoholic Liver Disease	CHD7
Alcoholic Liver Disease	CHD9
Alcoholic Liver Disease	CHDH
Alcoholic Liver Disease	CHEK1
Alcoholic Liver Disease	CHEK2
Alcoholic Liver Disease	CHGA
Alcoholic Liver Disease	CHGB
Alcoholic Liver Disease	CHI3L1
Alcoholic Liver Disease	CHIT1
Alcoholic Liver Disease	CHKA
Alcoholic Liver Disease	CHKB
Alcoholic Liver Disease	CHML
Alcoholic Liver Disease	CHMP2B
Alcoholic Liver Disease	CHN1
Alcoholic Liver Disease	CHPT1
Alcoholic Liver Disease	CHRM1
Alcoholic Liver Disease	CHRM2
Alcoholic Liver Disease	CHRM3
Alcoholic Liver Disease	CHRNA7
Alcoholic Liver Disease	CHRNG
Alcoholic Liver Disease	CHUK
Alcoholic Liver Disease	CIB1
Alcoholic Liver Disease	CIDEC
Alcoholic Liver Disease	CIITA
Alcoholic Liver Disease	CILP2
Alcoholic Liver Disease	CISD2
Alcoholic Liver Disease	CISH
Alcoholic Liver Disease	CKAP4
Alcoholic Liver Disease	CKB
Alcoholic Liver Disease	CKM
Alcoholic Liver Disease	CKS1B
Alcoholic Liver Disease	CLASRP
Alcoholic Liver Disease	CLCA2
Alcoholic Liver Disease	CLCN1
Alcoholic Liver Disease	CLCN2
Alcoholic Liver Disease	CLCN7
Alcoholic Liver Disease	CLCNKB
Alcoholic Liver Disease	CLDN1
Alcoholic Liver Disease	CLDN10
Alcoholic Liver Disease	CLDN11
Alcoholic Liver Disease	CLDN2
Alcoholic Liver Disease	CLDN3
Alcoholic Liver Disease	CLDN4
Alcoholic Liver Disease	CLDN7
Alcoholic Liver Disease	CLDND1
Alcoholic Liver Disease	CLEC12A
Alcoholic Liver Disease	CLEC16A
Alcoholic Liver Disease	CLEC4A
Alcoholic Liver Disease	CLEC4E
Alcoholic Liver Disease	CLEC7A
Alcoholic Liver Disease	CLGN
Alcoholic Liver Disease	CLN3
Alcoholic Liver Disease	CLN5
Alcoholic Liver Disease	CLOCK
Alcoholic Liver Disease	CLPS
Alcoholic Liver Disease	CLPTM1L
Alcoholic Liver Disease	CLRN1
Alcoholic Liver Disease	CLRN1-AS1
Alcoholic Liver Disease	CLTC
Alcoholic Liver Disease	CLTCL1
Alcoholic Liver Disease	CLU
Alcoholic Liver Disease	CMA1
Alcoholic Liver Disease	CMKLR1
Alcoholic Liver Disease	CMPK1
Alcoholic Liver Disease	CNBP
Alcoholic Liver Disease	CNP
Alcoholic Liver Disease	CNR1
Alcoholic Liver Disease	CNR2
Alcoholic Liver Disease	CNTF
Alcoholic Liver Disease	CNTN2
Alcoholic Liver Disease	CNTN5
Alcoholic Liver Disease	CNTNAP1
Alcoholic Liver Disease	CNTNAP2
Alcoholic Liver Disease	COASY
Alcoholic Liver Disease	COG2
Alcoholic Liver Disease	COG5
Alcoholic Liver Disease	COG6
Alcoholic Liver Disease	COG7
Alcoholic Liver Disease	COL11A1
Alcoholic Liver Disease	COL11A2
Alcoholic Liver Disease	COL12A1
Alcoholic Liver Disease	COL13A1
Alcoholic Liver Disease	COL14A1
Alcoholic Liver Disease	COL1A1
Alcoholic Liver Disease	COL1A2
Alcoholic Liver Disease	COL25A1
Alcoholic Liver Disease	COL2A1
Alcoholic Liver Disease	COL3A1
Alcoholic Liver Disease	COL4A1
Alcoholic Liver Disease	COL4A2
Alcoholic Liver Disease	COL4A3
Alcoholic Liver Disease	COL4A4
Alcoholic Liver Disease	COL4A5
Alcoholic Liver Disease	COL4A6
Alcoholic Liver Disease	COL6A1
Alcoholic Liver Disease	COL6A3
Alcoholic Liver Disease	COL7A1
Alcoholic Liver Disease	COLEC10
Alcoholic Liver Disease	COLGALT1
Alcoholic Liver Disease	COMMD1
Alcoholic Liver Disease	COMP
Alcoholic Liver Disease	COMT
Alcoholic Liver Disease	COPA
Alcoholic Liver Disease	COPB2
Alcoholic Liver Disease	COPG2IT1
Alcoholic Liver Disease	COPS5
Alcoholic Liver Disease	COPZ1
Alcoholic Liver Disease	COQ8A
Alcoholic Liver Disease	COX15
Alcoholic Liver Disease	COX4I1
Alcoholic Liver Disease	COX4I2
Alcoholic Liver Disease	COX5A
Alcoholic Liver Disease	COX5B
Alcoholic Liver Disease	COX6A1
Alcoholic Liver Disease	COX6A2
Alcoholic Liver Disease	COX6B1
Alcoholic Liver Disease	COX6B2
Alcoholic Liver Disease	COX6C
Alcoholic Liver Disease	COX7A1
Alcoholic Liver Disease	COX7A2
Alcoholic Liver Disease	COX7A2L
Alcoholic Liver Disease	COX7B
Alcoholic Liver Disease	COX7B2
Alcoholic Liver Disease	COX7C
Alcoholic Liver Disease	COX8A
Alcoholic Liver Disease	COX8C
Alcoholic Liver Disease	CP
Alcoholic Liver Disease	CPA1
Alcoholic Liver Disease	CPB2
Alcoholic Liver Disease	CPB2-AS1
Alcoholic Liver Disease	CPE
Alcoholic Liver Disease	CPLANE1
Alcoholic Liver Disease	CPLX1
Alcoholic Liver Disease	CPOX
Alcoholic Liver Disease	CPQ
Alcoholic Liver Disease	CPS1
Alcoholic Liver Disease	CPT1A
Alcoholic Liver Disease	CPT1B
Alcoholic Liver Disease	CPT2
Alcoholic Liver Disease	CR1
Alcoholic Liver Disease	CR1L
Alcoholic Liver Disease	CR2
Alcoholic Liver Disease	CRABP1
Alcoholic Liver Disease	CRABP2
Alcoholic Liver Disease	CRACR2A
Alcoholic Liver Disease	CRAT
Alcoholic Liver Disease	CRB1
Alcoholic Liver Disease	CREB1
Alcoholic Liver Disease	CREB3
Alcoholic Liver Disease	CREB3L3
Alcoholic Liver Disease	CREB5
Alcoholic Liver Disease	CREBBP
Alcoholic Liver Disease	CRH
Alcoholic Liver Disease	CRHR1
Alcoholic Liver Disease	CRHR2
Alcoholic Liver Disease	CRKL
Alcoholic Liver Disease	CRLS1
Alcoholic Liver Disease	CRNDE
Alcoholic Liver Disease	CRP
Alcoholic Liver Disease	CRTC1
Alcoholic Liver Disease	CRX
Alcoholic Liver Disease	CRY1
Alcoholic Liver Disease	CRY2
Alcoholic Liver Disease	CRYAA
Alcoholic Liver Disease	CRYAB
Alcoholic Liver Disease	CRYGS
Alcoholic Liver Disease	CS
Alcoholic Liver Disease	CSAD
Alcoholic Liver Disease	CSF1
Alcoholic Liver Disease	CSF1R
Alcoholic Liver Disease	CSF2
Alcoholic Liver Disease	CSF2RA
Alcoholic Liver Disease	CSF3
Alcoholic Liver Disease	CSF3R
Alcoholic Liver Disease	CSK
Alcoholic Liver Disease	CSMD1
Alcoholic Liver Disease	CSN1S1
Alcoholic Liver Disease	CSN2
Alcoholic Liver Disease	CSN3
Alcoholic Liver Disease	CSNK1A1
Alcoholic Liver Disease	CSNK1D
Alcoholic Liver Disease	CSNK1E
Alcoholic Liver Disease	CSNK2A1
Alcoholic Liver Disease	CSNK2A2
Alcoholic Liver Disease	CSNK2B
Alcoholic Liver Disease	CST3
Alcoholic Liver Disease	CSTA
Alcoholic Liver Disease	CSTB
Alcoholic Liver Disease	CTBP1
Alcoholic Liver Disease	CTC1
Alcoholic Liver Disease	CTCF
Alcoholic Liver Disease	CTDNEP1
Alcoholic Liver Disease	CTF1
Alcoholic Liver Disease	CTH
Alcoholic Liver Disease	CTHRC1
Alcoholic Liver Disease	CTLA4
Alcoholic Liver Disease	CTNNA1
Alcoholic Liver Disease	CTNNA3
Alcoholic Liver Disease	CTNNB1
Alcoholic Liver Disease	CTNND1
Alcoholic Liver Disease	CTNND2
Alcoholic Liver Disease	CTNS
Alcoholic Liver Disease	CTPS1
Alcoholic Liver Disease	CTRC
Alcoholic Liver Disease	CTRL
Alcoholic Liver Disease	CTSA
Alcoholic Liver Disease	CTSB
Alcoholic Liver Disease	CTSC
Alcoholic Liver Disease	CTSD
Alcoholic Liver Disease	CTSG
Alcoholic Liver Disease	CTSK
Alcoholic Liver Disease	CTSL
Alcoholic Liver Disease	CTSS
Alcoholic Liver Disease	CTTN
Alcoholic Liver Disease	CTU2
Alcoholic Liver Disease	CUBN
Alcoholic Liver Disease	CUEDC2
Alcoholic Liver Disease	CUL1
Alcoholic Liver Disease	CUL3
Alcoholic Liver Disease	CWF19L1
Alcoholic Liver Disease	CX3CL1
Alcoholic Liver Disease	CX3CR1
Alcoholic Liver Disease	CXADR
Alcoholic Liver Disease	CXCL1
Alcoholic Liver Disease	CXCL10
Alcoholic Liver Disease	CXCL11
Alcoholic Liver Disease	CXCL12
Alcoholic Liver Disease	CXCL16
Alcoholic Liver Disease	CXCL2
Alcoholic Liver Disease	CXCL8
Alcoholic Liver Disease	CXCL9
Alcoholic Liver Disease	CXCR1
Alcoholic Liver Disease	CXCR2
Alcoholic Liver Disease	CXCR3
Alcoholic Liver Disease	CXCR4
Alcoholic Liver Disease	CXCR5
Alcoholic Liver Disease	CYB561
Alcoholic Liver Disease	CYB5A
Alcoholic Liver Disease	CYB5B
Alcoholic Liver Disease	CYB5R1
Alcoholic Liver Disease	CYB5R3
Alcoholic Liver Disease	CYBA
Alcoholic Liver Disease	CYBB
Alcoholic Liver Disease	CYC1
Alcoholic Liver Disease	CYCS
Alcoholic Liver Disease	CYGB
Alcoholic Liver Disease	CYLD
Alcoholic Liver Disease	CYP11A1
Alcoholic Liver Disease	CYP11B1
Alcoholic Liver Disease	CYP11B2
Alcoholic Liver Disease	CYP17A1
Alcoholic Liver Disease	CYP19A1
Alcoholic Liver Disease	CYP1A1
Alcoholic Liver Disease	CYP1A2
Alcoholic Liver Disease	CYP1B1
Alcoholic Liver Disease	CYP20A1
Alcoholic Liver Disease	CYP21A2
Alcoholic Liver Disease	CYP24A1
Alcoholic Liver Disease	CYP26A1
Alcoholic Liver Disease	CYP27A1
Alcoholic Liver Disease	CYP27B1
Alcoholic Liver Disease	CYP2A13
Alcoholic Liver Disease	CYP2A6
Alcoholic Liver Disease	CYP2A7
Alcoholic Liver Disease	CYP2B6
Alcoholic Liver Disease	CYP2C18
Alcoholic Liver Disease	CYP2C19
Alcoholic Liver Disease	CYP2C8
Alcoholic Liver Disease	CYP2C9
Alcoholic Liver Disease	CYP2D6
Alcoholic Liver Disease	CYP2E1
Alcoholic Liver Disease	CYP2F1
Alcoholic Liver Disease	CYP2J2
Alcoholic Liver Disease	CYP2U1
Alcoholic Liver Disease	CYP3A4
Alcoholic Liver Disease	CYP3A5
Alcoholic Liver Disease	CYP46A1
Alcoholic Liver Disease	CYP4A11
Alcoholic Liver Disease	CYP4A22
Alcoholic Liver Disease	CYP4B1
Alcoholic Liver Disease	CYP4F11
Alcoholic Liver Disease	CYP4F12
Alcoholic Liver Disease	CYP4F2
Alcoholic Liver Disease	CYP4F3
Alcoholic Liver Disease	CYP4F8
Alcoholic Liver Disease	CYP4X1
Alcoholic Liver Disease	CYP4Z1
Alcoholic Liver Disease	CYP51A1
Alcoholic Liver Disease	CYP7A1
Alcoholic Liver Disease	CYP7B1
Alcoholic Liver Disease	CYP8B1
Alcoholic Liver Disease	CYSLTR1
Alcoholic Liver Disease	CYSLTR2
Alcoholic Liver Disease	CYTOR
Alcoholic Liver Disease	DAB1
Alcoholic Liver Disease	DACT1
Alcoholic Liver Disease	DAG1
Alcoholic Liver Disease	DAGLA
Alcoholic Liver Disease	DAGLB
Alcoholic Liver Disease	DANCR
Alcoholic Liver Disease	DAO
Alcoholic Liver Disease	DARS1
Alcoholic Liver Disease	DARS2
Alcoholic Liver Disease	DBH
Alcoholic Liver Disease	DBI
Alcoholic Liver Disease	DBN1
Alcoholic Liver Disease	DBT
Alcoholic Liver Disease	DCAF8
Alcoholic Liver Disease	DCHS2
Alcoholic Liver Disease	DCK
Alcoholic Liver Disease	DCLK1
Alcoholic Liver Disease	DCLRE1C
Alcoholic Liver Disease	DCN
Alcoholic Liver Disease	DCT
Alcoholic Liver Disease	DCTN1
Alcoholic Liver Disease	DCX
Alcoholic Liver Disease	DCXR
Alcoholic Liver Disease	DDB1
Alcoholic Liver Disease	DDC
Alcoholic Liver Disease	DDHD1
Alcoholic Liver Disease	DDHD2
Alcoholic Liver Disease	DDIT3
Alcoholic Liver Disease	DDIT4
Alcoholic Liver Disease	DDO
Alcoholic Liver Disease	DDR1
Alcoholic Liver Disease	DDR2
Alcoholic Liver Disease	DDX1
Alcoholic Liver Disease	DDX11
Alcoholic Liver Disease	DDX17
Alcoholic Liver Disease	DDX27
Alcoholic Liver Disease	DDX3X
Alcoholic Liver Disease	DDX46
Alcoholic Liver Disease	DDX5
Alcoholic Liver Disease	DDX50
Alcoholic Liver Disease	DDX58
Alcoholic Liver Disease	DDX6
Alcoholic Liver Disease	DDX60
Alcoholic Liver Disease	DDX60L
Alcoholic Liver Disease	DEAF1
Alcoholic Liver Disease	DECR1
Alcoholic Liver Disease	DEDD2
Alcoholic Liver Disease	DEFA1
Alcoholic Liver Disease	DEFA5
Alcoholic Liver Disease	DEFB1
Alcoholic Liver Disease	DEFB103B
Alcoholic Liver Disease	DEFB4A
Alcoholic Liver Disease	DEGS1
Alcoholic Liver Disease	DEK
Alcoholic Liver Disease	DEPTOR
Alcoholic Liver Disease	DES
Alcoholic Liver Disease	DFFA
Alcoholic Liver Disease	DGAT1
Alcoholic Liver Disease	DGAT2
Alcoholic Liver Disease	DGAT2L6
Alcoholic Liver Disease	DGAT2L7P
Alcoholic Liver Disease	DGCR2
Alcoholic Liver Disease	DGCR8
Alcoholic Liver Disease	DGKA
Alcoholic Liver Disease	DGKB
Alcoholic Liver Disease	DGKD
Alcoholic Liver Disease	DGKE
Alcoholic Liver Disease	DGKG
Alcoholic Liver Disease	DGKH
Alcoholic Liver Disease	DGKI
Alcoholic Liver Disease	DGKQ
Alcoholic Liver Disease	DGKZ
Alcoholic Liver Disease	DGUOK
Alcoholic Liver Disease	DHCR24
Alcoholic Liver Disease	DHCR7
Alcoholic Liver Disease	DHDH
Alcoholic Liver Disease	DHFR
Alcoholic Liver Disease	DHRS11
Alcoholic Liver Disease	DHRS2
Alcoholic Liver Disease	DHRS4
Alcoholic Liver Disease	DHRS4L1
Alcoholic Liver Disease	DHRS4L2
Alcoholic Liver Disease	DHRS9
Alcoholic Liver Disease	DHX15
Alcoholic Liver Disease	DHX16
Alcoholic Liver Disease	DHX30
Alcoholic Liver Disease	DHX9
Alcoholic Liver Disease	DIABLO
Alcoholic Liver Disease	DICER1
Alcoholic Liver Disease	DIO2
Alcoholic Liver Disease	DIRC3
Alcoholic Liver Disease	DISC1
Alcoholic Liver Disease	DISC2
Alcoholic Liver Disease	DKC1
Alcoholic Liver Disease	DKK1
Alcoholic Liver Disease	DKK3
Alcoholic Liver Disease	DLAT
Alcoholic Liver Disease	DLD
Alcoholic Liver Disease	DLEU1
Alcoholic Liver Disease	DLG1
Alcoholic Liver Disease	DLG3
Alcoholic Liver Disease	DLG4
Alcoholic Liver Disease	DLK1
Alcoholic Liver Disease	DLST
Alcoholic Liver Disease	DMD
Alcoholic Liver Disease	DMGDH
Alcoholic Liver Disease	DMP1
Alcoholic Liver Disease	DMPK
Alcoholic Liver Disease	DNA2
Alcoholic Liver Disease	DNAH8
Alcoholic Liver Disease	DNAJA1
Alcoholic Liver Disease	DNAJA3
Alcoholic Liver Disease	DNAJB11
Alcoholic Liver Disease	DNAJC10
Alcoholic Liver Disease	DNAJC11
Alcoholic Liver Disease	DNAJC13
Alcoholic Liver Disease	DNAJC21
Alcoholic Liver Disease	DNASE1
Alcoholic Liver Disease	DNASE2B
Alcoholic Liver Disease	DNM1
Alcoholic Liver Disease	DNM1L
Alcoholic Liver Disease	DNM2
Alcoholic Liver Disease	DNM3
Alcoholic Liver Disease	DNMT1
Alcoholic Liver Disease	DNMT3A
Alcoholic Liver Disease	DNMT3B
Alcoholic Liver Disease	DOCK7
Alcoholic Liver Disease	DOCK8
Alcoholic Liver Disease	DOK7
Alcoholic Liver Disease	DOLK
Alcoholic Liver Disease	DPAGT1
Alcoholic Liver Disease	DPEP1
Alcoholic Liver Disease	DPM1
Alcoholic Liver Disease	DPP10-AS1
Alcoholic Liver Disease	DPP4
Alcoholic Liver Disease	DPYD
Alcoholic Liver Disease	DPYSL2
Alcoholic Liver Disease	DR1
Alcoholic Liver Disease	DRAIC
Alcoholic Liver Disease	DRD1
Alcoholic Liver Disease	DRD2
Alcoholic Liver Disease	DRD3
Alcoholic Liver Disease	DRD4
Alcoholic Liver Disease	DRD5
Alcoholic Liver Disease	DROSHA
Alcoholic Liver Disease	DSC2
Alcoholic Liver Disease	DSC3
Alcoholic Liver Disease	DSCAM-AS1
Alcoholic Liver Disease	DSCAML1
Alcoholic Liver Disease	DSG2
Alcoholic Liver Disease	DSP
Alcoholic Liver Disease	DSPP
Alcoholic Liver Disease	DSTYK
Alcoholic Liver Disease	DTD1
Alcoholic Liver Disease	DTNBP1
Alcoholic Liver Disease	DUOX1
Alcoholic Liver Disease	DUSP1
Alcoholic Liver Disease	DUSP13
Alcoholic Liver Disease	DUSP14
Alcoholic Liver Disease	DUSP19
Alcoholic Liver Disease	DUSP3
Alcoholic Liver Disease	DUSP6
Alcoholic Liver Disease	DVL1
Alcoholic Liver Disease	DVL2
Alcoholic Liver Disease	DVL3
Alcoholic Liver Disease	DYNC1H1
Alcoholic Liver Disease	DYRK1B
Alcoholic Liver Disease	DYSF
Alcoholic Liver Disease	E2F1
Alcoholic Liver Disease	E2F2
Alcoholic Liver Disease	E2F3
Alcoholic Liver Disease	E2F4
Alcoholic Liver Disease	EAPP
Alcoholic Liver Disease	EARS2
Alcoholic Liver Disease	EBF1
Alcoholic Liver Disease	EBF3
Alcoholic Liver Disease	EBNA1BP2
Alcoholic Liver Disease	EBP
Alcoholic Liver Disease	ECE1
Alcoholic Liver Disease	ECE2
Alcoholic Liver Disease	ECI2
Alcoholic Liver Disease	ECM1
Alcoholic Liver Disease	ECT2
Alcoholic Liver Disease	EDAR
Alcoholic Liver Disease	EDC4
Alcoholic Liver Disease	EDN1
Alcoholic Liver Disease	EDN3
Alcoholic Liver Disease	EDNRA
Alcoholic Liver Disease	EDNRB
Alcoholic Liver Disease	EEA1
Alcoholic Liver Disease	EEF1A1
Alcoholic Liver Disease	EEF1A1P20
Alcoholic Liver Disease	EEF1A2
Alcoholic Liver Disease	EEF1D
Alcoholic Liver Disease	EEF2
Alcoholic Liver Disease	EEF2K
Alcoholic Liver Disease	EFHD1
Alcoholic Liver Disease	EFHD2
Alcoholic Liver Disease	EFNA1
Alcoholic Liver Disease	EFNA3
Alcoholic Liver Disease	EFNA5
Alcoholic Liver Disease	EFNB1
Alcoholic Liver Disease	EFNB2
Alcoholic Liver Disease	EFS
Alcoholic Liver Disease	EFTUD2
Alcoholic Liver Disease	EGF
Alcoholic Liver Disease	EGFL6
Alcoholic Liver Disease	EGFR
Alcoholic Liver Disease	EGLN1
Alcoholic Liver Disease	EGLN2
Alcoholic Liver Disease	EGOT
Alcoholic Liver Disease	EGR1
Alcoholic Liver Disease	EGR2
Alcoholic Liver Disease	EHBP1L1
Alcoholic Liver Disease	EHD1
Alcoholic Liver Disease	EHHADH
Alcoholic Liver Disease	EHMT1
Alcoholic Liver Disease	EHMT2
Alcoholic Liver Disease	EI24
Alcoholic Liver Disease	EIF2AK2
Alcoholic Liver Disease	EIF2AK3
Alcoholic Liver Disease	EIF2AK4
Alcoholic Liver Disease	EIF2B1
Alcoholic Liver Disease	EIF2D
Alcoholic Liver Disease	EIF2S1
Alcoholic Liver Disease	EIF2S2
Alcoholic Liver Disease	EIF2S3
Alcoholic Liver Disease	EIF3A
Alcoholic Liver Disease	EIF3B
Alcoholic Liver Disease	EIF3E
Alcoholic Liver Disease	EIF3F
Alcoholic Liver Disease	EIF3L
Alcoholic Liver Disease	EIF4A1
Alcoholic Liver Disease	EIF4A2
Alcoholic Liver Disease	EIF4A3
Alcoholic Liver Disease	EIF4B
Alcoholic Liver Disease	EIF4E
Alcoholic Liver Disease	EIF4EBP1
Alcoholic Liver Disease	EIF4G1
Alcoholic Liver Disease	EIF5B
Alcoholic Liver Disease	EIF6
Alcoholic Liver Disease	ELANE
Alcoholic Liver Disease	ELAVL1
Alcoholic Liver Disease	ELAVL2
Alcoholic Liver Disease	ELAVL4
Alcoholic Liver Disease	ELF3
Alcoholic Liver Disease	ELK1
Alcoholic Liver Disease	ELK4
Alcoholic Liver Disease	ELN
Alcoholic Liver Disease	ELOVL4
Alcoholic Liver Disease	ELOVL5
Alcoholic Liver Disease	ELOVL6
Alcoholic Liver Disease	ELP1
Alcoholic Liver Disease	ELP3
Alcoholic Liver Disease	EMD
Alcoholic Liver Disease	EMG1
Alcoholic Liver Disease	EMSY
Alcoholic Liver Disease	EMX2
Alcoholic Liver Disease	EN2
Alcoholic Liver Disease	ENAH
Alcoholic Liver Disease	ENG
Alcoholic Liver Disease	ENHO
Alcoholic Liver Disease	ENO1
Alcoholic Liver Disease	ENO2
Alcoholic Liver Disease	ENOX2
Alcoholic Liver Disease	ENPEP
Alcoholic Liver Disease	ENPP1
Alcoholic Liver Disease	ENPP2
Alcoholic Liver Disease	ENPP7
Alcoholic Liver Disease	ENSG00000179253
Alcoholic Liver Disease	ENSG00000197462
Alcoholic Liver Disease	ENSG00000207171
Alcoholic Liver Disease	ENSG00000213117
Alcoholic Liver Disease	ENSG00000219736
Alcoholic Liver Disease	ENSG00000220748
Alcoholic Liver Disease	ENSG00000222042
Alcoholic Liver Disease	ENSG00000225906
Alcoholic Liver Disease	ENSG00000226026
Alcoholic Liver Disease	ENSG00000226973
Alcoholic Liver Disease	ENSG00000229119
Alcoholic Liver Disease	ENSG00000229282
Alcoholic Liver Disease	ENSG00000231487
Alcoholic Liver Disease	ENSG00000231984
Alcoholic Liver Disease	ENSG00000232739
Alcoholic Liver Disease	ENSG00000233983
Alcoholic Liver Disease	ENSG00000234034
Alcoholic Liver Disease	ENSG00000234389
Alcoholic Liver Disease	ENSG00000234481
Alcoholic Liver Disease	ENSG00000235464
Alcoholic Liver Disease	ENSG00000235503
Alcoholic Liver Disease	ENSG00000235584
Alcoholic Liver Disease	ENSG00000236389
Alcoholic Liver Disease	ENSG00000236501
Alcoholic Liver Disease	ENSG00000237596
Alcoholic Liver Disease	ENSG00000237936
Alcoholic Liver Disease	ENSG00000241679
Alcoholic Liver Disease	ENSG00000243273
Alcoholic Liver Disease	ENSG00000248537
Alcoholic Liver Disease	ENSG00000249631
Alcoholic Liver Disease	ENSG00000249664
Alcoholic Liver Disease	ENSG00000250001
Alcoholic Liver Disease	ENSG00000250541
Alcoholic Liver Disease	ENSG00000251152
Alcoholic Liver Disease	ENSG00000251730
Alcoholic Liver Disease	ENSG00000252040
Alcoholic Liver Disease	ENSG00000253092
Alcoholic Liver Disease	ENSG00000253111
Alcoholic Liver Disease	ENSG00000253354
Alcoholic Liver Disease	ENSG00000254171
Alcoholic Liver Disease	ENSG00000254599
Alcoholic Liver Disease	ENSG00000255046
Alcoholic Liver Disease	ENSG00000257322
Alcoholic Liver Disease	ENSG00000258506
Alcoholic Liver Disease	ENSG00000259053
Alcoholic Liver Disease	ENSG00000259080
Alcoholic Liver Disease	ENSG00000260234
Alcoholic Liver Disease	ENSG00000265994
Alcoholic Liver Disease	ENSG00000266602
Alcoholic Liver Disease	ENSG00000268473
Alcoholic Liver Disease	ENSG00000270927
Alcoholic Liver Disease	ENSG00000271078
Alcoholic Liver Disease	ENSG00000271682
Alcoholic Liver Disease	ENSG00000272479
Alcoholic Liver Disease	ENSG00000274121
Alcoholic Liver Disease	ENSG00000275383
Alcoholic Liver Disease	ENSG00000276067
Alcoholic Liver Disease	ENSG00000276627
Alcoholic Liver Disease	ENSG00000279217
Alcoholic Liver Disease	ENSG00000279912
Alcoholic Liver Disease	ENSG00000280306
Alcoholic Liver Disease	ENSG00000283174
Alcoholic Liver Disease	ENSG00000284676
Alcoholic Liver Disease	ENSG00000285529
Alcoholic Liver Disease	ENSG00000286071
Alcoholic Liver Disease	ENSG00000287032
Alcoholic Liver Disease	ENSG00000287092
Alcoholic Liver Disease	ENSG00000287292
Alcoholic Liver Disease	ENSG00000287720
Alcoholic Liver Disease	ENSG00000288092
Alcoholic Liver Disease	ENTPD1
Alcoholic Liver Disease	ENTPD2
Alcoholic Liver Disease	EP300
Alcoholic Liver Disease	EPAS1
Alcoholic Liver Disease	EPB41L2
Alcoholic Liver Disease	EPB41L4A-DT
Alcoholic Liver Disease	EPCAM
Alcoholic Liver Disease	EPG5
Alcoholic Liver Disease	EPHA2
Alcoholic Liver Disease	EPHA3
Alcoholic Liver Disease	EPHA4
Alcoholic Liver Disease	EPHB4
Alcoholic Liver Disease	EPHX1
Alcoholic Liver Disease	EPHX2
Alcoholic Liver Disease	EPM2A
Alcoholic Liver Disease	EPO
Alcoholic Liver Disease	EPOR
Alcoholic Liver Disease	EPRS1
Alcoholic Liver Disease	EPS8L3
Alcoholic Liver Disease	EPSTI1
Alcoholic Liver Disease	EPX
Alcoholic Liver Disease	ERAL1
Alcoholic Liver Disease	ERBB2
Alcoholic Liver Disease	ERBB3
Alcoholic Liver Disease	ERBB4
Alcoholic Liver Disease	ERCC1
Alcoholic Liver Disease	ERCC2
Alcoholic Liver Disease	ERCC4
Alcoholic Liver Disease	ERCC5
Alcoholic Liver Disease	ERCC6
Alcoholic Liver Disease	ERCC6L2
Alcoholic Liver Disease	ERCC8
Alcoholic Liver Disease	EREG
Alcoholic Liver Disease	ERFE
Alcoholic Liver Disease	ERG
Alcoholic Liver Disease	ERLIN1
Alcoholic Liver Disease	ERLIN2
Alcoholic Liver Disease	ERMN
Alcoholic Liver Disease	ERN1
Alcoholic Liver Disease	ERN2
Alcoholic Liver Disease	ERP44
Alcoholic Liver Disease	ERRFI1
Alcoholic Liver Disease	ERVH48-1
Alcoholic Liver Disease	ERVK-6
Alcoholic Liver Disease	ESCO2
Alcoholic Liver Disease	ESM1
Alcoholic Liver Disease	ESR1
Alcoholic Liver Disease	ESR2
Alcoholic Liver Disease	ESRRA
Alcoholic Liver Disease	ESRRB
Alcoholic Liver Disease	ESRRG
Alcoholic Liver Disease	ESYT1
Alcoholic Liver Disease	ESYT2
Alcoholic Liver Disease	ETAA1
Alcoholic Liver Disease	ETFA
Alcoholic Liver Disease	ETFDH
Alcoholic Liver Disease	ETS1
Alcoholic Liver Disease	ETS1-AS1
Alcoholic Liver Disease	ETV4
Alcoholic Liver Disease	ETV5
Alcoholic Liver Disease	ETV6
Alcoholic Liver Disease	EVC
Alcoholic Liver Disease	EVC2
Alcoholic Liver Disease	EWSR1
Alcoholic Liver Disease	EXO1
Alcoholic Liver Disease	EXOC7
Alcoholic Liver Disease	EXOSC10
Alcoholic Liver Disease	EXT1
Alcoholic Liver Disease	EXT2
Alcoholic Liver Disease	EYA1
Alcoholic Liver Disease	EZH2
Alcoholic Liver Disease	EZR
Alcoholic Liver Disease	F10
Alcoholic Liver Disease	F13A1
Alcoholic Liver Disease	F2
Alcoholic Liver Disease	F2R
Alcoholic Liver Disease	F2RL1
Alcoholic Liver Disease	F3
Alcoholic Liver Disease	F5
Alcoholic Liver Disease	F7
Alcoholic Liver Disease	F9
Alcoholic Liver Disease	FA2H
Alcoholic Liver Disease	FAAH
Alcoholic Liver Disease	FAAH2
Alcoholic Liver Disease	FABP1
Alcoholic Liver Disease	FABP12
Alcoholic Liver Disease	FABP2
Alcoholic Liver Disease	FABP3
Alcoholic Liver Disease	FABP4
Alcoholic Liver Disease	FABP5
Alcoholic Liver Disease	FABP5P3
Alcoholic Liver Disease	FABP6
Alcoholic Liver Disease	FADD
Alcoholic Liver Disease	FADS1
Alcoholic Liver Disease	FADS2
Alcoholic Liver Disease	FADS3
Alcoholic Liver Disease	FAF1
Alcoholic Liver Disease	FAF2
Alcoholic Liver Disease	FAH
Alcoholic Liver Disease	FAIM
Alcoholic Liver Disease	FAM107B
Alcoholic Liver Disease	FAM126A
Alcoholic Liver Disease	FAM166B
Alcoholic Liver Disease	FAM171A1
Alcoholic Liver Disease	FAM172A
Alcoholic Liver Disease	FAM174A
Alcoholic Liver Disease	FAM20C
Alcoholic Liver Disease	FAM3A
Alcoholic Liver Disease	FAM3B
Alcoholic Liver Disease	FAM3C
Alcoholic Liver Disease	FANCC
Alcoholic Liver Disease	FANCD2
Alcoholic Liver Disease	FAP
Alcoholic Liver Disease	FAR1
Alcoholic Liver Disease	FAR2
Alcoholic Liver Disease	FARP1
Alcoholic Liver Disease	FARSA
Alcoholic Liver Disease	FARSB
Alcoholic Liver Disease	FAS
Alcoholic Liver Disease	FASLG
Alcoholic Liver Disease	FASN
Alcoholic Liver Disease	FAT1
Alcoholic Liver Disease	FAT4
Alcoholic Liver Disease	FBL
Alcoholic Liver Disease	FBLN1
Alcoholic Liver Disease	FBLN5
Alcoholic Liver Disease	FBN1
Alcoholic Liver Disease	FBP1
Alcoholic Liver Disease	FBP2
Alcoholic Liver Disease	FBXO11
Alcoholic Liver Disease	FBXO32
Alcoholic Liver Disease	FBXW7
Alcoholic Liver Disease	FCER2
Alcoholic Liver Disease	FCGR1A
Alcoholic Liver Disease	FCGR2A
Alcoholic Liver Disease	FCGR3A
Alcoholic Liver Disease	FCGRT
Alcoholic Liver Disease	FDFT1
Alcoholic Liver Disease	FDPS
Alcoholic Liver Disease	FDX1
Alcoholic Liver Disease	FDXR
Alcoholic Liver Disease	FECH
Alcoholic Liver Disease	FECHP1
Alcoholic Liver Disease	FETUB
Alcoholic Liver Disease	FEZF1
Alcoholic Liver Disease	FFAR2
Alcoholic Liver Disease	FFAR3
Alcoholic Liver Disease	FFAR4
Alcoholic Liver Disease	FGA
Alcoholic Liver Disease	FGB
Alcoholic Liver Disease	FGD4
Alcoholic Liver Disease	FGF1
Alcoholic Liver Disease	FGF14-AS2
Alcoholic Liver Disease	FGF17
Alcoholic Liver Disease	FGF19
Alcoholic Liver Disease	FGF2
Alcoholic Liver Disease	FGF21
Alcoholic Liver Disease	FGF23
Alcoholic Liver Disease	FGF3
Alcoholic Liver Disease	FGF4
Alcoholic Liver Disease	FGF5
Alcoholic Liver Disease	FGF6
Alcoholic Liver Disease	FGF7
Alcoholic Liver Disease	FGF8
Alcoholic Liver Disease	FGF9
Alcoholic Liver Disease	FGFR1
Alcoholic Liver Disease	FGFR2
Alcoholic Liver Disease	FGFR3
Alcoholic Liver Disease	FGFR4
Alcoholic Liver Disease	FGFRL1
Alcoholic Liver Disease	FGL1
Alcoholic Liver Disease	FGR
Alcoholic Liver Disease	FH
Alcoholic Liver Disease	FHIT
Alcoholic Liver Disease	FHL1
Alcoholic Liver Disease	FHL2
Alcoholic Liver Disease	FHL5
Alcoholic Liver Disease	FIBP
Alcoholic Liver Disease	FIG4
Alcoholic Liver Disease	FIS1
Alcoholic Liver Disease	FKBP1A
Alcoholic Liver Disease	FKRP
Alcoholic Liver Disease	FKTN
Alcoholic Liver Disease	FLAD1
Alcoholic Liver Disease	FLG
Alcoholic Liver Disease	FLI1
Alcoholic Liver Disease	FLNA
Alcoholic Liver Disease	FLNB
Alcoholic Liver Disease	FLNC
Alcoholic Liver Disease	FLOT1
Alcoholic Liver Disease	FLOT2
Alcoholic Liver Disease	FLRT3
Alcoholic Liver Disease	FLT1
Alcoholic Liver Disease	FLT3
Alcoholic Liver Disease	FLT4
Alcoholic Liver Disease	FLVCR1
Alcoholic Liver Disease	FMN1
Alcoholic Liver Disease	FMNL3
Alcoholic Liver Disease	FMO3
Alcoholic Liver Disease	FMR1
Alcoholic Liver Disease	FN1
Alcoholic Liver Disease	FNBP1L
Alcoholic Liver Disease	FNBP4
Alcoholic Liver Disease	FNDC3B
Alcoholic Liver Disease	FNDC5
Alcoholic Liver Disease	FOLH1
Alcoholic Liver Disease	FOLR1
Alcoholic Liver Disease	FOS
Alcoholic Liver Disease	FOSL1
Alcoholic Liver Disease	FOXA1
Alcoholic Liver Disease	FOXA2
Alcoholic Liver Disease	FOXC1
Alcoholic Liver Disease	FOXC2
Alcoholic Liver Disease	FOXC2-AS1
Alcoholic Liver Disease	FOXCUT
Alcoholic Liver Disease	FOXF1
Alcoholic Liver Disease	FOXG1
Alcoholic Liver Disease	FOXL1
Alcoholic Liver Disease	FOXL2
Alcoholic Liver Disease	FOXM1
Alcoholic Liver Disease	FOXN1
Alcoholic Liver Disease	FOXN3
Alcoholic Liver Disease	FOXO1
Alcoholic Liver Disease	FOXO3
Alcoholic Liver Disease	FOXP1
Alcoholic Liver Disease	FOXP3
Alcoholic Liver Disease	FPR1
Alcoholic Liver Disease	FPR2
Alcoholic Liver Disease	FRAS1
Alcoholic Liver Disease	FREM1
Alcoholic Liver Disease	FRK
Alcoholic Liver Disease	FRMD4A
Alcoholic Liver Disease	FSCN1
Alcoholic Liver Disease	FSHB
Alcoholic Liver Disease	FST
Alcoholic Liver Disease	FTCD
Alcoholic Liver Disease	FTH1
Alcoholic Liver Disease	FTL
Alcoholic Liver Disease	FTO
Alcoholic Liver Disease	FUCA1
Alcoholic Liver Disease	FUCA2
Alcoholic Liver Disease	FUNDC2
Alcoholic Liver Disease	FURIN
Alcoholic Liver Disease	FUS
Alcoholic Liver Disease	FXN
Alcoholic Liver Disease	FXYD1
Alcoholic Liver Disease	FYN
Alcoholic Liver Disease	FZD2
Alcoholic Liver Disease	FZD4
Alcoholic Liver Disease	FZD5
Alcoholic Liver Disease	FZD7
Alcoholic Liver Disease	FZR1
Alcoholic Liver Disease	G0S2
Alcoholic Liver Disease	G3BP1
Alcoholic Liver Disease	G6PC
Alcoholic Liver Disease	G6PD
Alcoholic Liver Disease	GAA
Alcoholic Liver Disease	GAB1
Alcoholic Liver Disease	GABBR1
Alcoholic Liver Disease	GABBR2
Alcoholic Liver Disease	GABPA
Alcoholic Liver Disease	GABRA2
Alcoholic Liver Disease	GABRA3
Alcoholic Liver Disease	GABRA4
Alcoholic Liver Disease	GABRD
Alcoholic Liver Disease	GABRG2
Alcoholic Liver Disease	GAD1
Alcoholic Liver Disease	GAD2
Alcoholic Liver Disease	GADD45A
Alcoholic Liver Disease	GAL
Alcoholic Liver Disease	GAL3ST1
Alcoholic Liver Disease	GAL3ST2
Alcoholic Liver Disease	GALC
Alcoholic Liver Disease	GALK1
Alcoholic Liver Disease	GALNS
Alcoholic Liver Disease	GALNT2
Alcoholic Liver Disease	GANAB
Alcoholic Liver Disease	GANC
Alcoholic Liver Disease	GAP43
Alcoholic Liver Disease	GAPDH
Alcoholic Liver Disease	GAR1
Alcoholic Liver Disease	GARS1
Alcoholic Liver Disease	GART
Alcoholic Liver Disease	GAS5
Alcoholic Liver Disease	GAS6
Alcoholic Liver Disease	GAST
Alcoholic Liver Disease	GATA1
Alcoholic Liver Disease	GATA2
Alcoholic Liver Disease	GATA3
Alcoholic Liver Disease	GATA4
Alcoholic Liver Disease	GATA6
Alcoholic Liver Disease	GATAD2A
Alcoholic Liver Disease	GATAD2B
Alcoholic Liver Disease	GBA
Alcoholic Liver Disease	GBE1
Alcoholic Liver Disease	GBF1
Alcoholic Liver Disease	GC
Alcoholic Liver Disease	GCAT
Alcoholic Liver Disease	GCG
Alcoholic Liver Disease	GCGR
Alcoholic Liver Disease	GCH1
Alcoholic Liver Disease	GCK
Alcoholic Liver Disease	GCKR
Alcoholic Liver Disease	GCLC
Alcoholic Liver Disease	GCLM
Alcoholic Liver Disease	GCN1
Alcoholic Liver Disease	GDAP1
Alcoholic Liver Disease	GDE1
Alcoholic Liver Disease	GDF15
Alcoholic Liver Disease	GDF3
Alcoholic Liver Disease	GDF5
Alcoholic Liver Disease	GDF6
Alcoholic Liver Disease	GDNF
Alcoholic Liver Disease	GEMIN4
Alcoholic Liver Disease	GFAP
Alcoholic Liver Disease	GFER
Alcoholic Liver Disease	GFPT1
Alcoholic Liver Disease	GGCX
Alcoholic Liver Disease	GGH
Alcoholic Liver Disease	GGPS1
Alcoholic Liver Disease	GGT1
Alcoholic Liver Disease	GGT2
Alcoholic Liver Disease	GGT3P
Alcoholic Liver Disease	GGT5
Alcoholic Liver Disease	GGTLC3
Alcoholic Liver Disease	GH1
Alcoholic Liver Disease	GHR
Alcoholic Liver Disease	GHRH
Alcoholic Liver Disease	GHRHR
Alcoholic Liver Disease	GHRL
Alcoholic Liver Disease	GHSR
Alcoholic Liver Disease	GIMAP5
Alcoholic Liver Disease	GIP
Alcoholic Liver Disease	GJA1
Alcoholic Liver Disease	GJA4
Alcoholic Liver Disease	GJA5
Alcoholic Liver Disease	GJA8
Alcoholic Liver Disease	GJB1
Alcoholic Liver Disease	GJB2
Alcoholic Liver Disease	GJB3
Alcoholic Liver Disease	GJB4
Alcoholic Liver Disease	GJB6
Alcoholic Liver Disease	GJC1
Alcoholic Liver Disease	GJC2
Alcoholic Liver Disease	GJC3
Alcoholic Liver Disease	GJD3
Alcoholic Liver Disease	GK
Alcoholic Liver Disease	GK2
Alcoholic Liver Disease	GLA
Alcoholic Liver Disease	GLB1
Alcoholic Liver Disease	GLDC
Alcoholic Liver Disease	GLE1
Alcoholic Liver Disease	GLI1
Alcoholic Liver Disease	GLI2
Alcoholic Liver Disease	GLI3
Alcoholic Liver Disease	GLO1
Alcoholic Liver Disease	GLP1R
Alcoholic Liver Disease	GLRA2
Alcoholic Liver Disease	GLRX
Alcoholic Liver Disease	GLS
Alcoholic Liver Disease	GLS2
Alcoholic Liver Disease	GLT8D2
Alcoholic Liver Disease	GLTP
Alcoholic Liver Disease	GLUD1
Alcoholic Liver Disease	GLUL
Alcoholic Liver Disease	GLYAT
Alcoholic Liver Disease	GLYCTK
Alcoholic Liver Disease	GM2A
Alcoholic Liver Disease	GMDS
Alcoholic Liver Disease	GMNN
Alcoholic Liver Disease	GMPPB
Alcoholic Liver Disease	GMPS
Alcoholic Liver Disease	GNAI1
Alcoholic Liver Disease	GNAO1
Alcoholic Liver Disease	GNAQ
Alcoholic Liver Disease	GNAS
Alcoholic Liver Disease	GNAZ
Alcoholic Liver Disease	GNB1
Alcoholic Liver Disease	GNB3
Alcoholic Liver Disease	GNB4
Alcoholic Liver Disease	GNE
Alcoholic Liver Disease	GNG12
Alcoholic Liver Disease	GNG2
Alcoholic Liver Disease	GNMT
Alcoholic Liver Disease	GNPAT
Alcoholic Liver Disease	GNRH1
Alcoholic Liver Disease	GNRHR
Alcoholic Liver Disease	GOLM1
Alcoholic Liver Disease	GOSR2
Alcoholic Liver Disease	GOT1
Alcoholic Liver Disease	GOT2
Alcoholic Liver Disease	GP1BA
Alcoholic Liver Disease	GP1BB
Alcoholic Liver Disease	GP9
Alcoholic Liver Disease	GPAM
Alcoholic Liver Disease	GPBAR1
Alcoholic Liver Disease	GPC1
Alcoholic Liver Disease	GPC3
Alcoholic Liver Disease	GPC4
Alcoholic Liver Disease	GPC6
Alcoholic Liver Disease	GPD1
Alcoholic Liver Disease	GPD2
Alcoholic Liver Disease	GPER1
Alcoholic Liver Disease	GPIHBP1
Alcoholic Liver Disease	GPLD1
[truncated: 3,339 more rows]
