# Supplementary material for: Systematic characterization of Puerariae Flos metabolites in vivo and assessment of its protective mechanisms against alcoholic liver injury in a rat model
Source: Front Pharmacol. 2022 Aug 30;13:915535. doi: 10.3389/fphar.2022.915535 (PMC9468746; doi:10.3389/fphar.2022.915535)
Supplement: Supplementary file 10 [file Table5.XLSX]

## Sheet: 终
No.	tR	Formula		[M-H]—			Identification	Area				Relative content (%)
			Calculated	Observed	ppm	MS/MS		Plasma	Urine	Bile	Feces	Plasma	Urine	Bile	Feces
M1	3.26	C28H30O18	653.135	653.131	-5.97	477, 301, 286	dihydrotectorigenin-7G-4'G	0	2438.4	0	0	—	0.0296882	—	—
M2	3.53	C28H28O18	651.12	651.119	-0.46	475, 299, 284	tectorigenin-7G-4'G	0	40728.4	4946.2	0	—	0.49588	0.158305	—
M3	3.98	C22H20O14S	539.05	539.05	0.19	363, 283, 268	glycitein-7G-4'-S	0	0	184427	0	—	—	5.90264	—
M4	4.1	C28H30O17	637.14	637.141	0.16	461, 299, 284	TE-7G	0	0	26263.7	0	—	—	0.840578	—
M5	4.2	C22H22O13	493.098	493.097	-2.43	317, 301, 286	8-OH-dihydrotectorigenin-7G	0	28104.5	0	0	—	0.34218	—	—
M6	4.26	C22H22O13S	525.07	525.07	0.19	445, 283, 268	glycitin-4'S	0	0	91175.2	0	—	—	2.91809	—
M7	4.44	C27H26O17	621.109	621.111	2.09	445, 269, 133	genistein-7G-4'G	0	14097.2	5597	0	—	0.171637	0.179134	—
M8	4.45	C22H22O13	493.098	493.097	-1.62	317, 302	dihydro-irilinD-7G	0	23424.9	0	0	—	0.285205	—	—
M9	4.51	C21H20O12	463.088	463.086	-3.46	287, 259	6-OH-dihydrogenistein -7G	1746.77	36214.1	8640.1	0	1.17507	0.440917	0.276529	—
P1	4.69	C21H22O11	449.108	449.108	-0.22	287, 269	dihydrokaempferol-7-O-glucoside	0	2286.9	0	0	—	0.0278437	—	—
M10	4.76	C28H30O17	637.14	637.145	7.85	461, 299, 284	TE-4'G	0	0	1974.6	0	—	—	0.0631977	—
M11	5.16	C21H18O14S	525.034	525.034	-0.38	349, 269, 133	genistein-7G-4'S	0	104269	486449	0	—	1.2695	15.5689	—
P2	5.3	C27H30O15	593.151	593.15	-1.85	285, 151	nicotiflorin	0	2035.9	0	0	—	0.0247877	—	—
M12	5.38	C21H20O13S	511.055	511.053	-2.35	431, 269, 133	genistin-7S	0	6368.4	73672.1	0	—	0.0775371	2.3579	—
M13	5.48	C16H14O10S	397.023	397.023	-0.25	317, 301, 286	8-OH-dihydrotectorigenin-7S	0	152776	0	0	—	1.8601	—	—
M14	5.53	C22H22O14S	541.065	541.062	-5.73	461, 299, 284	TE-7S	0	0	8030.6	0	—	—	0.257022	—
M15	5.79	C21H18O14S	525.034	525.036	4.19	349, 269, 133	genistein-7S-4'G	8997.67	1310.93	0	0	6.05285	0.015961	—	—
M16	5.92	C27H30O18S	673.107	673.107	0	379, 299, 284	Te-7XG-4'S	0	0	203695	0	—	—	6.51931	—
M17	6.21	C22H22O14S	541.065	541.064	-1.66	461, 299, 284	TE-4'S	0	28050	971187	0	—	0.341517	31.0831	—
M18	6.56	C28H28O19	667.115	667.116	1.5	491, 315, 300	irilin D-7G-4'G	0	3187.8	1309.4	0	—	0.0388124	0.0419077	—
M19	6.71	C22H20O15S	555.044	555.044	-0.72	379, 299, 284	Te-7G-4'S	18085	1.86546e+06	0	0	12.166	22.7125	—	—
M20	6.87	C22H20O16S	571.039	571.039	0	395, 315, 299, 284	8-OH -Te-7G-4'S	0	203447	145264	0	—	2.47702	4.64921	—
M21	6.89	C22H20O11	459.093	459.091	-2.61	283, 268	glycitein-7G	5369	166421	140162	0	3.61179	2.02623	4.48593	—
M22	7.14	C22H22O15S	557.06	557.059	-2.51	477, 301, 286	dihydrotectorigenine-7G-4'S	0	28922.5	25968.1	0	—	0.35214	0.831117	—
M23	7.17	C16H12O11S2	442.974	442.975	1.13	363, 283, 268	glycitein-7S-4'S	0	1345.8	0	0	—	0.0163855	—	—
P3	7.28	C22H22O10	445.113	445.114	0.22	283, 268, 239	glycitin	0	3252.1	0	0	—	0.0395953	—	—
M24	7.37	C22H20O11	459.093	459.092	-1.09	283, 268	glycitein-4'G	0	8968.3	4541.7	0	—	0.109192	0.145358	—
M25	7.4	C22H20O13	491.083	491.082	-1.83	315, 299, 284	8-OH-tectorigenine-7G	0	11450.1	0	0	—	0.139408	—	—
M26	7.88	C16H14O6	301.071	301.072	-0.66	286, 257	dihydrotectorigenin	6539.07	241370	0	0	4.39891	2.93875	—	—
M27	8.1	C15H12O8S	351.017	351.016	-4.84	271, 253, 225	dihydrogenistein-7S	0	2034	4440.9	0	—	0.0247645	0.142132	—
M28	8.36	C16H12O12S2	458.969	458.967	-4.58	379, 299, 284	tectorigenin-7S-4'S	0	8590.3	1505.8	0	—	0.104589	0.0481936	—
M29	8.5	C15H12O6	287.056	287.056	1.74	259	6-OH-dihydrogenistein	0	0	0	581.9	—	—	—	0.132947
M30	8.67	C21H18O15S	541.029	541.031	3.7	461, 285133	6-OH-genistein-7G-4'S	0	0	24873.1	0	—	—	0.796071	—
M31	8.84	C21H20O13S	511.055	511.053	-2.15	431, 269, 133	genistin-4'S	0	0	6192.2	0	—	—	0.198183	—
P4	9.02	C27H30O16	609.146	609.141	-6.73	301, 285	rutin	0	1135.7	0	0	—	0.0138275	—	—
M32	9.21	C22H20O16S	571.039	571.039	-1.4	395, 315, 300	irilinD-7G-4'S	0	20064.6	6641	0	—	0.244292	0.212547	—
P5	9.75	C21H20O10	431.098	431.096	-3.94	269, 133	genistin	0	1874.8	0	0	—	0.0228262	—	—
P6	9.82	C27H30O15	593.151	593.151	0	299, 284, 255	Te-7XG	0	32818.4	127144	0	—	0.399573	4.06929	—
M33	10.15	C22H20O11	459.093	459.092	-0.44	283, 268	biochaninA-7G	0	12748.8	0	0	—	0.15522	—	—
M34	10.27	C16H12O10S	395.007	395.006	-2.53	315, 299, 284	8-OH-tectorigenin-7S	0	15270.8	0	0	—	0.185926	—	—
M35	10.44	C16H12O8S	363.017	363.02	6.06	283, 268	glycitein-7S	456.2	349925	26221.5	0	0.306891	4.26044	0.839227	—
M36	10.56	C22H20O12	475.088	475.086	-2.95	299, 284	Te-7G	47034.3	266992	257012	0	31.6405	3.25071	8.22576	—
P7	10.62	C22H22O11	461.108	461.108	-1.73	299, 284, 255	tectorodin	1053.6	42982	48563.5	0	0.70877	0.523318	1.55429	—
M37	10.74	C16H12O8S	363.017	363.017	-0.28	283, 268	glycitein-4'S	4307	60563.5	0	0	2.89737	0.737378	—	—
M38	10.8	C22H20O12	475.088	475.084	-7.16	299, 284	Te-4'G	1892.57	185321	31243.3	0	1.27315	2.25634	0.999951	—
M39	11.24	C22H20O13	491.083	491.082	-1.43	315, 300	irilinD-7G	0	13153.1	0	0	—	0.160143	—	—
M40	11.26	C16H12O8S	363.017	363.018	1.65	283, 268	biochaninA-7S	0	24856.1	0	0	—	0.30263	—	—
M41	11.39	C21H18O11	445.077	445.074	-6.29	269, 133	genistein-7G	1184	65601.3	0	0	0.796489	0.798715	—	—
M42	11.47	C15H10O8S	349.002	349	-6.3	269, 151	6-OH-daidzein-7S	0	4045.1	0	0	—	0.0492503	—	—
M43	11.58	C15H12O5	271.061	271.06	-2.58	253, 225	6-OH-dihydrodaidzein	0	0	0	3834.7	—	—	—	0.876117
M44	11.68	C21H18O11	445.077	445.077	-0.45	269133	genistein-4'G	0	22747.4	0	0	—	0.276956	—	—
M45	11.76	C21H18O12	461.072	461.071	-1.3	285, 133	6-OH-genistein-7G	3596.81	62674.4	19306.3	0	2.41962	0.763079	0.617904	—
M46	12.02	C16H14O10S	397.023	397.022	-2.52	317, 302	dihydroirilinD-7S	0	22524.1	0	0	—	0.274237	—	—
M47	12.04	C23H22O13	505.098	505.096	-3.76	329, 313, 298, 283, 255	8-OH-Ir-7G	820.8	91383.6	47854.4	0	0.552162	1.11262	1.53159	—
M49	12.24	C22H22O12	477.103	477.103	-1.05	301, 286	dihydrotectorigenin-7G	0	13546.1	0	0	—	0.164928	—	—
M48	12.24	C16H14O10S	397.023	397.021	-4.28	317, 302	dihydroirilinD-4'S	575.5	52684.3	0	0	0.387146	0.641446	—	—
P8	12.43	C21H20O11	447.093	447.097	9.84	285, 267	6-hydroxygenistein-7-O-glucoside	2312.3	22988.8	26272.9	0	1.55551	0.279895	0.840872	—
M50	12.75	C22H20O12	475.088	475.087	-1.05	299, 284, 255	6-OH-BiA-6G	0	102790	0	0	—	1.2515	—	—
M51	12.86	C16H14O9S	381.028	381.027	-2.89	301, 286	dihydrotectorigenin-7S	2239.32	205289	0	0	1.50641	2.49945	—	—
M52	13.03	C15H10O9S	364.997	364.997	0	285, 257	6-OH-genistein-7S	0	15394.1	0	0	—	0.187428	—	—
M53	13.34	C15H10O5	269.045	269.045	-0.74	151	6-OH-daidzein	0	0	0	5897.6	—	—	—	1.34743
M54	14.08	C15H10O8S	349.002	348.999	-8.31	269, 133	genistein-7S	1379.12	109708	0	0	0.92775	1.33572	—	—
M55	14.2	C16H12O9S	379.012	379.012	-2.11	299, 284	Te-7S	17992	718270	82624.3	0	12.1034	8.74515	2.64442	—
M56	14.53	C16H12O9S	379.012	379.013	2.37	299, 284	Te-4'S	0	572536	0	0	—	6.97079	—	—
M57	15.01	C16H12O10S	395.007	395.007	-1.27	315, 300	irilinD-7S	0	81946.7	0	0	—	0.997725	—	—
M58	16.23	C17H14O10S	409.023	409.023	-0.49	329, 313, 298, 283	8-OH-Ir-7S	0	103627	0	0	—	1.26169	—	—
M59	17.19	C15H10O6	285.04	285.039	-2.46	257, 229	6-OH-genistein	0		0	1140.1	—	—	—	0.26048
M60	17.26	C16H12O7	315.05	315.051	1.9	299, 284, 255	8-OH-tectorigenin	0		0	2062.4	—	—	—	0.471198
P9	18.44	C16H12O7	315.05	315.048	-6.98	300	irilinD	0	4883.7	0	0	—	0.0594605	—	—
M61	18.49	C16H14O5	285.076	285.076	-1.05	270	dihydroglycitein	0	2106.1	0	2353.8	—	0.0256424	—	0.537775
P10	19.02	C16H12O5	283.061	283.061	2.83	268	glycitein	1012.3	215461	0	1988.4	0.680988	2.6233	—	0.454291
M62	19.02	C23H22O13	505.098	505.094	-8.91	329, 314	iristectorigeninA-7G	0	22526.6	0	0	—	0.274268	—	—
P11	19.47	C15H10O6	285.04	285.038	-5.96	133	luteolin	0	7253.7	0	0	—	0.0883159	—	—
M63	19.86	C17H16O6	315.087	315.084	-7.62	300, 285, 257	dihydroirisolidone	0	493.6	0	0	—	0.00600972	—	—
P12	20.13	C8H8O4	167.034	167.035	0.6	108	vanillic acid	754.597	3534	0	0	0.507627	0.0430275	—	—
M64	20.72	C15H12O5	271.061	271.059	-6.27	253, 225	dihydrogenistein	0	11822.2	0	1141.7	—	0.143939	—	0.260845
M65	20.92	C16H14O6	301.071	301.071	-0.66	286, 257	6-OH-dihydrobiochaninA	0	137381	0	96119	—	1.67266	—	21.9604
M66	21.14	C17H14O10S	409.023	409.022	-3.42	329, 314	iristectorigeninA-7S	633.1	44451.4	0	0	0.425894	0.541209	—	—
M67	21.3	C17H14O9S	393.028	393.027	-2.8	313, 298, 283, 255	Ir-7S	2750	116580	0	0	1.84996	1.41939	—	—
M68	21.41	C16H12O6	299.056	299.055	-1	284, 255	isotectorigenin	364.5	147533	0	24914.6	0.245204	1.79625	—	5.69226
P13	21.43	C15H10O5	269.045	269.045	0.37	133	genistein	880.208	247722	0	11992.5	0.592127	3.01608	—	2.73994
M69	21.59	C23H24O12	491.119	491.117	-4.68	315, 300, 285	dihydroirisolidone-7G	0	2182.9	0	0	—	0.0265774	—	—
P14	21.74	C15H10O5	269.045	269.045	0.74	151	apigenin	0	24737.6	0	1689.3	—	0.301187	—	0.385956
P15	21.87	C16H12O6	299.056	299.055	-2.68	284, 255	tectorigenin	16462.3	748451	0	253298	11.0744	9.1126	—	57.8712
M70	22.13	C17H14O7	329.066	329.068	5.17	313, 298, 283, 255	8-OH-Ir	0	4512.8	0	903.6	—	0.0549446	—	0.206446
M71	22.2	C23H22O12	489.103	489.103	-1.02	313, 298, 283, 255	Ir-7G	0	56150.2	0	0	—	0.683645	—	—
M72	22.24	C18H16O6	327.087	327.088	4.28	313, 298, 283, 255	4',7-di-methyltectorigenin	213.928	814	0	0	0.143912	0.00991068	—	—
M73	22.3	C16H12O6	299.056	299.055	-0.67	284, 255	6-OH-biochaninA	0	29098.7	0	0	—	0.354285	—	—
P16	22.42	C17H14O7	329.066	329.066	-0.3	314	iristectorigeninA	0	20084.2	0	6789.6	—	0.244531	—	1.55123
P17	23.6	C16H12O4	267.066	267.066	1.12	252	formononetin	0	3665.5	0	0	—	0.0446285	—	—
M74	25.03	C16H14O5	285.076	285.075	-4.21	270	dihydrobiochaninA	0	0	0	582.8	—	—	—	0.133153
P18	25.47	C47H76O17	911.5	911.499	-1.87	765, 615, 457, 437	astragaloside VIII	0	3113.5	4307	0	—	0.0379078	0.137847	—
P19	25.52	C48H78O18	941.511	941.509	-2.34	795, 615, 457, 437	soyasaponin I	0	12291.2	11218	3318	—	0.149649	0.359036	0.758066
M75	25.56	C17H14O6	313.071	313.072	-0.66	298, 283, 255	isoirisolidone	0	3507.4	0	554.5	—	0.0427036	—	0.126687
M76	25.69	C16H12O5	283.061	283.06	-0.35	268	biochaninA	0	16912.6	0	1075.3	—	0.205916	—	0.245675
P20	25.86	C47H76O17	911.5	911.5	-0.44	765, 615, 457, 437	soyasaponin II	0	3418.8	0	1284.62	—	0.0416249	—	0.293497
P21	25.89	C17H14O6	313.071	313.071	0.64	298, 283, 255	irisolidone	0	13156.5	0	2820.9	—	0.160184	—	0.644493
P22	26.01	C48H78O17	925.516	925.517	0.97	779, 599, 441, 439	kaikasaponin III	0	12827.9	0	0	—	0.156183	—	—
P23	26.57	C42H68O13	779.458	779.458	-0.77	617, 439	kaikasaponin I	0	4056.3	4088.87	0	—	0.0493866	0.130865	—
P24	26.66	C47H76O16	895.505	895.504	-1.79	599, 441, 439	kakkasapnin I	0	4055.5	3500	0	—	0.0493769	0.112019	—
P25	26.75	C47H76O16	895.505	895.502	-3.8	599, 441, 439	baptisiasaponin I	0	4000	3222	0	—	0.0487011	0.103121	—
M77	27.54	C41H66O12	749.448	749.446	-2	587411409	demethyl-22-dehydroxyl- kaikasaponin I	0	2560	4948.9	0	—	0.0311687	0.158391	—
M78	27.92	C36H60O9	635.416	635.418	2.83	459438	reduct-soyasapogenol B-3-β-D-glucuronide	0	0	0	611.2	—	—	—	0.139641
M79	28.03	C31H50O3	469.368	469.367	-2.98	455439437	methyl- soyasapogenol E	0	0	0	6492.2	—	—	—	1.48328
M80	28.32	C30H48O5	487.342	487.34	-5.13	471455439	1, 21-dihydroxyl- soyasapogenol E	0	0	0	2395.5	—	—	—	0.547302
M81	28.89	C37H62O9	649.432	649.431	-1.39	473,459,441, 439	methyl-reduct-soyasapogenol B-3-β-D-glucuronide	0	0	0	990.8	—	—	—	0.226369
M82	29.31	C30H50O4	473.363	473.363	0.85	457, 437	1-hydroxyl-soyasapogenol B	0	0	0	2859.8	—	—	—	0.653381
								148652	8.21336e+06	3.12448e+06	437693	100	100	100	100
