# Supplementary material for: Systematic characterization of Puerariae Flos metabolites in vivo and assessment of its protective mechanisms against alcoholic liver injury in a rat model
Source: Front Pharmacol. 2022 Aug 30;13:915535. doi: 10.3389/fphar.2022.915535 (PMC9468746; doi:10.3389/fphar.2022.915535)
Supplement: Supplementary file 11 [file Table8.XLSX]

## Sheet: Sheet1
			ALT (U/L)				AST (U/L)				ALT (U/L)
			CON	ALD	PF	Tiopronin	CON	ALD	PF	Tiopronin	CON	ALD	PF	Tiopronin
		Rat 1	36	49	38	38	60	101	53	61	419	258	389	264
		Rat 2	40	61	37	45	70	85	65	85	410	298	296	208
		Rat 3	29	41	36	33	43	76	63	58	389	292	291	202
		Rat 4	39	52	32	43	64	80	47	72	362	270	426	321
		Rat 5	43	49	40	35	76	91	56	62	292	205	373	191
		Rat 6	37	39	47	30	57	58	74	58	306	269	390	147
					MAOA					PPARA
		Gray value		CON	ALD	PF	Tiopronin		CON	ALD	PF	Tiopronin
		Duplicate 1	MAOA	165675	339379	205336	239860	PPARA	2708	1007	2070	1891
			ACTIN	299339	293178	288338	298747	ACTIN	2604	2584	2568	2640
			比值	0.553469	1.15759	0.712136	0.802887	比值	1.03994	0.389706	0.806075	0.716288
		Duplicate 2	MAOA	165174	278860	265600	184155	PPARA	2038	830	1328	1296
			ACTIN	287571	247105	271354	269778	ACTIN	2125	2176	2224	2209
			比值	0.574376	1.12851	0.978795	0.682617	比值	0.959059	0.381434	0.597122	0.586691
		Duplicate 3	MAOA	230167	429338	324031	254273	PPARA	2270	967	1980	1840
			ACTIN	357961	308816	332084	264998	ACTIN	2112	2008	2209	2116
			比值	0.642995	1.39027	0.97575	0.959528	比值	1.07481	0.481574	0.896333	0.869565
			MAOA				PPARA	PPARA
		Normalized value	CON	ALD	PF	Tiopronin	CON	ALD	PF	Tiopronin
		Duplicate 1	0.937639	1.96108	1.20644	1.36018	1.01497	0.380348	0.786719	0.699088
		Duplicate 2	0.973057	1.91182	1.65819	1.15643	0.93603	0.372275	0.582784	0.572603
		Duplicate 3	1.0893	2.35527	1.65303	1.62555	1.049	0.47001	0.874811	0.848685
